1 **Hookworm-derived small molecule extracts suppress pathology in a mouse model of colitis**  
2 **and inhibit secretion of key inflammatory cytokines in primary human leukocytes**

3

4 Phurpa Wangchuk<sup>a\*</sup>, Constantin Constantinoiu<sup>b</sup>, Konstantinos A. Kouremenos<sup>c</sup>, Luke Becker<sup>a</sup>,  
5 Linda Jones<sup>a</sup>, Catherine Shepherd<sup>a</sup>, Geraldine Buitrago<sup>a</sup>, Paul Giacomini<sup>a</sup>, Norelle Daly<sup>a</sup>, Malcolm  
6 J. McConville<sup>c</sup>, Rachael Y. M. Ryan<sup>a</sup>, John J. Miles<sup>a</sup>, Alex Loukas<sup>a\*</sup>

7

8 <sup>a</sup>Centre for Biodiscovery and Molecular Development of Therapeutics, Australian Institute of  
9 Tropical Health and Medicine, James Cook University, Cairns, QLD 4878, Australia.

10 <sup>b</sup>College of Public Health, Medical and Veterinary Sciences, Centre for Biosecurity in Tropical  
11 Infectious Diseases, James Cook University, Townsville, QLD 4878, Australia.

12 <sup>c</sup>Metabolomics Australia, Bio21 Molecular Science and Biotechnology Institute, University of  
13 Melbourne, 30 Flemington Road, Parkville, VIC 3010, Australia.

14

15 Running Head: Anti-inflammatory hookworm small molecules

16

17 \*Corresponding author: Prof. Alex Loukas ([alex.loukas@jcu.edu.au](mailto:alex.loukas@jcu.edu.au)), Australian Institute of  
18 Tropical Health and Medicine, Building E4, James Cook University, McGregor Rd., Smithfield,  
19 QLD 4878, Australia; Dr Phurpa Wangchuk ([phurpa.wangchuk@jcu.edu.au](mailto:phurpa.wangchuk@jcu.edu.au)), Australian Institute  
20 of Tropical Health and Medicine, Building E4, James Cook University, McGregor Rd.,  
21 Smithfield, QLD 4878, Australia

22

23

24

25

26

27 **ABSTRACT** Iatrogenic hookworm therapy shows promise for treating disorders that result from  
28 a dysregulated immune system, including inflammatory bowel disease (IBD). Here we use a  
29 metabolomics approach to characterize the non-protein small molecule complement of  
30 hookworms. Gas chromatography-mass spectrometry and liquid chromatography-mass  
31 spectrometry analyses of somatic tissue extracts revealed the presence of 52 polar metabolites  
32 and 22 non-polar components including short chain fatty acids (SCFA). Several of these small  
33 metabolites, notably the SCFA, have been shown to have anti-inflammatory properties in various  
34 diseases, including IBD. Using a murine model of colitis and human peripheral blood  
35 mononuclear cells, we demonstrate that somatic tissue extracts of the hookworm *Ancylostoma*  
36 *caninum* contain small molecules with anti-inflammatory activities. Of the five extracts tested,  
37 two of them significantly protected mice against T cell-mediated immunopathology and weight  
38 loss in a chemically-induced colitis model. Moreover, one of the anti-colitic extracts suppressed  
39 *ex vivo* production of inflammatory cytokines from primary human leukocytes. While the origin  
40 of the SCFA (parasite or host microbiota-derived) present in the hookworm somatic tissue  
41 extracts cannot be ascertained from this study, it is possible that *A. caninum* may be actively  
42 promoting an anti-inflammatory host microbiome by facilitating immune crosstalk through SCFA  
43 production.

44

45 **KEYWORDS** Hookworm; *Ancylostoma caninum*; Somatic tissue extracts; Ulcerative colitis;  
46 Short chain fatty acids; GC-MS; Metabolome

47

48

49

50

51

52

53 Inflammatory Bowel Disease (IBD) is associated with chronic inflammation of the  
54 digestive tract, and primarily includes ulcerative colitis (UC) and Crohn's disease (CD). The  
55 etiology of IBD is not well established but it is usually characterized by inflammation, loss of  
56 appetite and weight, chronic diarrhea, bloody stools, fever, rectal bleeding, abdominal pain,  
57 fatigue, and anemia (1-3). IBD has been linked to many extra-intestinal manifestations (4) and  
58 implicated with mental health problems (5). Current treatments for IBD include, 5-  
59 aminosalicylates, glucocorticosteroids, immunomodulators and biologics, and proctocolectomy  
60 as a last resort when drug treatment fails. Many of these drugs are often associated with side-  
61 effects and various postoperative complications (6, 7). Frontline biologics such as treatment with  
62 anti-TNF monoclonal antibodies are only efficacious in some patients and treatment does not  
63 result in long term cure (8). Failure of these frontline treatments is associated with elevated risk  
64 of colon cancer, and can result in the need for surgical removal of the colon (partial or full).  
65 There is therefore an urgent need for new and effective anti-inflammatory drugs to treat IBD.

66 Guided by millennia of host-parasite co-evolution, we (9-13) and others (14-16) have  
67 demonstrated the therapeutic properties of experimental hookworm infection to treat  
68 gastrointestinal (GI) inflammatory diseases. Hookworms resident in the human GI tract induce  
69 tolerogenic dendritic cells and regulatory T cells which produce suppressor cytokines that keep  
70 inflammatory T cells and their effector molecules in check (17, 18). While iatrogenic hookworm  
71 therapy shows promise for treating numerous inflammatory diseases in humans, it presents many  
72 challenges including apprehension by the patient to readily accept such a radical intervention,  
73 safety concerns and regulatory hurdles. In order to circumvent these limitations, we have  
74 investigated whether the immunomodulatory properties of hookworms are due to specific  
75 metabolites in the parasite's somatic tissue or excretory/secretory products (ESP). Administration

76 of hookworm ESP to mice protected against inflammation and weight loss in two different  
77 mouse models of chemically-induced colitis - the T cell-dependent trinitrobenzene sulfonic acid  
78 (TNBS) model (19) and the T cell-independent dextran sulfate sodium (DSS) model (20). We  
79 previously characterized the protein constituents (>10 kDa) of hookworm ESP (21), and recently  
80 identified a single protein, *Ac-AIP-2*, which in recombinant form displays immunomodulatory  
81 properties in a mouse model of asthma that was dependent on regulatory T cells and tolerogenic  
82 dendritic cells (DC) (22). A related protein termed *Ac-AIP-1* was recently shown to protect  
83 against inducible colitis by inducing accumulation of regulatory T cells in the mucosa and  
84 production of suppressor cytokines including IL-10 and TGF- $\beta$  (23). Despite progress on the  
85 immunoregulatory properties of hookworm ES proteins, much less is known about the  
86 composition and anti-inflammatory properties of non-protein small metabolites or low molecular  
87 weight metabolites (LMWM; <10 kDa) in hookworm ESP (24).

88 Other nematodes, namely the parasitic *Ascaris lumbricoides* and free-living  
89 *Caenorhabditis elegans*, produce many biologically active LMWM including ascarosides and  
90 short chain fatty acids (SCFA) that have diverse biological properties (25). We therefore  
91 hypothesized that parasitic nematodes such as hookworms produce LMWM, some of which  
92 might have immunoregulatory properties and therefore present as potential anti-inflammatory  
93 drug candidates. Using the TNBS model of colitis, we demonstrate that select crude hookworm  
94 LMWM extracts afford significant protection against inducible acute colitis in mice and suppress  
95 *ex vivo* inflammatory cytokine production from human peripheral blood mononuclear cells  
96 (PBMC). Furthermore, we have undertaken both gas chromatography mass spectrometry (GC-  
97 MS)- and liquid chromatography mass spectrometry (LC-MS)-guided metabolomics analyses of  
98 *A. caninum* total somatic tissue extract and the anti-colitic fractions, and mined these datasets for  
99 likely anti-inflammatory candidates.

101

## 102 **RESULTS**

103 To understand the anti-inflammatory role of somatic tissue extracts of adult *A. caninum* and  
104 to identify small molecules present in the bioactive extracts, we collected hookworms from dogs,  
105 ground them into powder, extracted the LMWM with solvents, and then identified the LMWM  
106 present in these extracts using metabolomics techniques. The solvent extractions and preparation  
107 of crude extracts were conducted using natural products extraction protocols by sequentially  
108 extracting the ground powder with different solvents including mixed solvents of hexane:  
109 dichloromethane: acetonitrile (1:1:1 v/v; HDA), followed by dichloromethane (DCM), methanol  
110 (MeOH), acidified aqueous (Acidic) and basified aqueous (Basic) solvents. This extraction  
111 yielded five somatic extracts (SE) including SE-HDA, SE-DCM, SE-MeOH, SE-Acidic and SE-  
112 Basic, which were tested for their anti-inflammatory activities in a mouse model of TNBS-  
113 induced colitis and mitogen-stimulated human PBMC.

### 114 **Hookworm SE-HDA and SE-MeOH protect mice against clinical symptoms of colitis.**

115 Five hookworm somatic tissue extracts were tested for their anti-inflammatory activities using the  
116 modified experimental design and TNBS induction in BALB/c mice as previously described by  
117 us (26). Extracts (50 µg/mouse) were administered intraperitoneally (i.p.) prior to intra-rectal  
118 (i.r.) injection of TNBS and the mice were monitored daily for three days for progression of  
119 clinical symptoms of colitis. Of five extracts tested, SE-HDA and SE-MeOH significantly  
120 protected mice against TNBS-induced clinical symptoms of colitis including body weight loss,  
121 lethargy (mobility), piloerection, diarrhea (fecal consistency) and fecal pellet counts (Fig.1).

122

123

<<<Insert Figure 1>>>

124

125 **Mice treated with hookworm SE-HDA and SE-MeOH extracts showed reduced**  
126 **pathology.** Mice were euthanized on the fifth day of the experiment and scored for pathological  
127 progression of colonic inflammation, and colon length was measured. In congruence with the  
128 clinical scores, colons of mice treated with SE-HDA and SE-MeOH showed significantly less  
129 colonic pathology than those of untreated mice, with significantly longer colon lengths (Fig. 2A),  
130 significantly reduced colon thickening (Fig. 2B), fewer adhesions (Fig. 2C), less edema (Fig.  
131 2D), and less ulceration (Fig. 2E).

132

133 <<<Insert Figure 2>>>

134

135 **Mice treated with hookworm SE-HDA and SE-MeOH showed well-preserved colon**  
136 **architecture.** Of five hookworm extracts tested, SE-HDA and SE-MeOH showed well-preserved  
137 colon architecture in comparison to the TNBS control group (Fig.3). Naive (healthy control  
138 group) mice showed normal colon tissue architecture with healthy crypts and goblet cells, and  
139 normal lamina propria and mucosal integrity. Mice that were administered TNBS only (not  
140 treated with extracts) developed colitis and exhibited severe thickening of the lamina propria and  
141 colon wall musculature, edema, mucosal erosion and destruction of goblet cells. Increased  
142 numbers of leukocytes and polymorphonuclear cell infiltrates were clearly evident in the lamina  
143 propria and intraepithelial compartments of colons from untreated mice administered TNBS.  
144 Treatment with SE-HDA and SE-MeOH prior to administration of TNBS significantly protected  
145 against TNBS-induced histopathological damage. Treated mice had well-formed crypts, large  
146 numbers of goblet cells, and displayed generally healthy mucosal integrity that was comparable  
147 to naive mice that did not received TNBS. The other three hookworm LMWM extracts including  
148 SE-DCM, SE-Acidic and SE-Basic did not protect mice against histopathological damage  
149 induced by TNBS. Scoring of histological sections for overall colon pathology showed that mice

150 treated with SE-HDA extract had significantly reduced histopathology whereas the SE-MeOH-  
151 treated group demonstrated a non-significant trend towards reduced histopathology when  
152 compared with TNBS control mice.

153

154

<<<Insert Figure 3>>>

155 **Mice treated with hookworm SE-HDA and SE-MeOH extracts had non-significant**  
156 **reductions in colonic inflammatory cytokine production.** Mouse colons were surgically  
157 removed, cleaned of feces, sliced into 1 cm long pieces, cultured overnight and the supernatants  
158 were assessed for colonic cytokine secretion levels. The protection of mice against clinical and  
159 pathological changes was consistent with colonic cytokine responses, which showed a non-  
160 significant trend towards reduced IFN- $\gamma$  (P = 0.3538) and IL-17A (P = 0.1510) levels in mice  
161 treated with SE-HDA and SE-MeOH (Fig.4).

162

163

<<<Insert Figure 4>>>

164

165 **SE-HDA suppressed *ex vivo* inflammatory cytokine production by human peripheral**  
166 **blood mononuclear cells.** SE-HDA, SE-DCM and SE-MeOH were assessed for anti-  
167 inflammatory properties on human PBMC stimulated *ex vivo* with lipopolysaccharide (LPS) to  
168 promote cytokine production by myeloid cells or PMA/ionomycin to promote cytokine  
169 production by T cells. T cell cytokine production was moderately reduced by SE-HDA at 20  
170  $\mu\text{g/ml}$  including a 14% reduction in IL-2 (P < 0.001), a 34% reduction in IL-6 (P < 0.05), a 59%  
171 reduction in monocyte chemoattractant protein-1 (MCP-1) (P < 0.001) and a 33% reduction in  
172 TNF- $\alpha$  (P < 0.05) (data not shown) compared to stimulated cells that were not co-cultured with  
173 hookworm extracts. We observed a very potent effect of SE-HDA on myeloid cells. LPS-induced

174 cytokines were reduced in the presence of SE-HDA (at 20 µg/ml) including an 88% reduction in  
175 IL-1β (P < 0.0001), a 37% reduction in IL-6 (P < 0.01), a 58% reduction in TNF-α (P < 0.01) and  
176 an 84% reduction in MCP-1 (P < 0.0001) (Fig. 5).

177

178 <<<Insert Figure 5>>>

179

180 A dose-response analysis of the SE-HDA extract at final concentrations of 2, 10, 20 and 50 µg/ml  
181 showed that this extract significantly reduced the production of TNF-α, IL-1β, IL-6 and MCP-1  
182 production by LPS-activated PBMC in a dose dependent manner (Fig. 6). The greatest  
183 suppression of cytokine secretion was observed for MCP-1, with SE-HDA concentrations as low  
184 as 2 µg/ml yielding significantly reduced chemokine secretion. At 50 µg/ml SE-HDA  
185 concentration, LPS-stimulated MCP-1 levels were the same as those of unstimulated PBMCs.  
186 Analysis of six genetically unrelated individuals showed that SE-HDA suppression of LPS-  
187 activated PBMC was consistent with significant reductions in IL-1β, IL-6, IL-12 and MCP-1. A  
188 paired analysis of suppression in IL-1β and MCP-1 is shown in Fig. 6.

189

190 <<<Insert Figure 6>>>

191

192 **SE-HDA and SE-MeOH somatic tissue extracts contain anti-inflammatory small**  
193 **metabolites.** To characterize the small metabolites present in the protective somatic tissue  
194 extracts of *A. caninum*, we conducted targeted GC-MS and LC-MS metabolomics analyses of the  
195 underivatized SE-MeOH and SE-HDA extracts using methods described previously (27). The  
196 compounds were identified by comparing their ion patterns with the ion spectra of the known  
197 compounds indexed in the NIST database (28). Through GC-MS analyses, we identified a total of



198 32 metabolites from these two bioactive somatic tissue extracts (Table S1). Each extract  
199 contained 20 metabolites, with 12 of them found exclusively in each extract. Both extracts  
200 contained eight medium to long chain free saturated and unsaturated fatty acids (C<sub>11</sub> to C<sub>26</sub>).  
201 Palmitic acid, methyl palmitate, stearic acid and methyl stearate were abundant in both extracts.  
202 The most common mono/poly-unsaturated fatty acids present in both crude extracts were oleic  
203 acid, linoleic acid,  $\gamma$ -linolenic acid and palmitoleic acid. Six of these fatty acids including stearic  
204 acid (C18:0) (29), palmitic acid (C16:0) (30), methyl palmitate (31),  $\gamma$ -linolenic acid (32),  
205 palmitoleic acid (C16:1n-7) (33) and oleic acid (C18:1) (29, 34) have been reported to exhibit  
206 anti-inflammatory properties.

207 Using LC-MS, we identified eight SCFA, with isovalerate as the major component present  
208 in both the SE-MeOH and SE-HDA somatic extracts. Acetate, propionate, butyrate, 2-  
209 methylbutyrate, isovalerate, caproate and heptanoic acid were present in both protective  
210 fractions/extracts (Table S2). Isobutyrate was present only in the SE-MeOH extract. Acetate,  
211 propionate and butyrate (obtained from other synthetic sources) were previously reported to have  
212 anti-inflammatory activities (35).

### 213 **Global metabolomes of derivatized whole worm somatic tissue extract of hookworms.**

214 Metabolomics analyses of two protective extracts (SE-HDA and SE-MeOH) showed only the  
215 representative metabolomes of underivatized samples of hookworm extracts. To gain a global  
216 insight of small metabolites present in *A. caninum*, we conducted a targeted GC-MS and LC-MS  
217 metabolomics analyses of the methoximated, trimethylsilyl derivatized whole worm extract.  
218 Whole worm extracts were divided into polar and non-polar fractions. From the polar fraction,  
219 using GC-MS we identified 47 polar small metabolites (Table S3) belonging to seven  
220 chemotypes including amino acids, sugars, sugar phosphates, organic acids, glycerides,  
221 carbamides and oligosaccharides. Glycine, L-valine, L-proline, pyroglutamic acid, L-isoleucine,  
222 L-tryptophan, D-talose, D-glucose, L-lysine and  $\gamma$ -aminobutyric acid (GABA) were present in

223 abundance. Eleven of these polar metabolites including glycine (36), L-isoleucine (37), L-lysine  
224 (38),  $\gamma$ -aminobutyric acid (GABA) (39), mannitol (40), D-ribose (41), trehalose (42), L-histidine  
225 (43), uridine (44), L-methionine (45) and citric acid (46) have been previously shown to exhibit  
226 anti-inflammatory activities against various diseases, including arthritis, renal inflammation,  
227 subarachnoid hemorrhage, pulmonary fibrosis and other conditions.

228 From the non-polar fraction, using GC-MS we identified 22 fatty acids (Table S4)  
229 comprising 17 saturated fatty acids (including stearic acid, palmitic acid, arachidic acid, margaric  
230 acid and myristic acid) and five unsaturated fatty acids (including elaidic acid, oleic acid, erucic  
231 acid, petroselinic acid, and nervonic acid). Literature review and content analyses revealed that at  
232 least seven of these fatty acids including stearic acid (C18:0) (29), palmitic acid (C16:0) (30),  
233 methyl palmitate (31), lauric acid (C12:0) (47), capric acid (C10:0) (47),  $\gamma$ -linolenic acid (32) and  
234 caprylic acid (C8:0) (48) were previously reported to have anti-inflammatory activities.

235 Using LC-MS analysis, we identified five SCFA from whole worm somatic tissue extracts,  
236 including isobutyrate, propionate, 2-methylvalerate, acetate and butyrate (Table S2). Of these  
237 SCFA, acetate (C2:0), propionate and butyrate (C4:0) have been reported to be effective in  
238 preventing inflammation associated with IBD (35).

239

## 240 **DISCUSSION**

241 Parasitic helminths, such as hookworms, have evolved to establish chronic infections in the  
242 human gut while inducing minimal pathology when present in low numbers (17). Hookworms  
243 regulate the immune system of the host for their benefit and subsequently promote a state of  
244 immune tolerance. This regulated environment not only promotes longevity for the parasites but  
245 also reduces the likelihood of the host developing diseases that result from a dysregulated  
246 immune system (49). A significant number of experimental and clinical studies support the  
247 immunoregulatory proficiency of parasitic helminths against distinct immunopathologies,

248 including allergies, IBD and other autoimmune diseases (9, 16, 50-53). While iatrogenic infection  
249 with hookworms and other helminths shows promise for treating numerous inflammatory  
250 diseases in humans, the therapy presents many challenges including patient apprehension, safety  
251 concerns and regulatory hurdles (17, 54). We and others showed that *A. caninum* ES proteins  
252 (>10 kDa) have potent immunomodulatory properties and can protect mice against pathology in  
253 different inducible models of colitis (17, 19, 20, 55, 56) and asthma (22). Non-proteinaceous  
254 small metabolites derived from helminths, however, have received far less attention in terms of  
255 their molecular characterization and their immunoregulatory properties. Indeed, we recently  
256 proposed that helminth LMWM warrant in-depth investigation as an untapped source of new  
257 drugs for treating inflammation (24). Here we provide a molecular characterization of hookworm  
258 LMWM and assess the efficacy of five different LMWM extracts in preventing both the onset of  
259 inducible colitis in mice and inflammatory cytokine production by primary human leukocytes.

260         Considering the relative strengths and limitations of all the available animal models, we  
261 chose the TNBS colitis model, which represents an intestinal immune response to environmental  
262 triggers, to investigate the anti-inflammatory properties of hookworm somatic LMWM. The  
263 TNBS model induces a mixed Th1/Th2/Th17 response (8), facilitating its use in screening for  
264 drugs targeting a broad range of inflammatory pathways. The intestinal mucosa of a TNBS-  
265 treated mouse is characterized by rapid production of inflammatory cytokines such as IFN $\gamma$  and  
266 IL-17A (52). These cytokines are particularly important because disruption of the colonic  
267 mucosal layer by ethanolated TNBS dysregulates intestinal goblet cell function and elicits  
268 inflammation that drives the production of these cytokines. The colon contains epithelial goblet  
269 cells, which are instrumental in controlling intestinal immune homeostasis by producing a  
270 protective mucus layer. Therefore, any extracts/small molecules from intestinal worms that can  
271 promote retention of colonic mucus and inhibit inflammatory cytokine production have  
272 therapeutic potential. We showed that mice treated with *A. caninum* LMWM extracts (SE-MeOH

273 and SE-HDA) promoted retention of healthy gastrointestinal architecture after TNBS  
274 administration; this took the form of normal mucosal crypts, large numbers of unaltered goblet  
275 cells, and normal lamina propria and colon wall architecture in comparison to untreated groups  
276 that received TNBS. The colon culture supernatants and homogenates of these two treatment  
277 groups showed trends towards reduced expression (albeit non-significant) of TNBS-induced  
278 inflammatory cytokines, including IFN- $\gamma$  and IL-17A. The protection conferred by SE-MeOH  
279 and SE-HDA extracts against TNBS-induced colitis was, however, more evident in their ability  
280 to significantly reduce body weight loss, improve clinical IBD related symptoms (including  
281 abridged mobility, piloerection and fecal consistency), and arrest pathological progression  
282 (including colon length shortening, colon wall thickening, adhesion, edema and ulceration).  
283 However, when these two anti-colitic somatic tissue extracts were assessed *ex vivo* for  
284 suppression of LPS-activated human PBMC, only treatment with SE-HDA resulted in significant  
285 suppression of pro-inflammatory cytokines including TNF- $\alpha$ , IL-1 $\beta$ , IL-6 and the chemokine  
286 MCP-1. Despite conferring robust protection against TNBS-induced colitis in mice, SE-MeOH  
287 did not suppress the production of LPS-stimulated cytokines by human PBMC. This could be due  
288 to distinct mechanisms of action of the bioactive components in each of the two models, or might  
289 also reflect the presence of different bioactive metabolites in the two distinct fractions. SE-HDA-  
290 induced suppression of inflammatory cytokines and chemokines was dose dependent, and  
291 particularly potent for MCP-1. MCP-1 and other chemotactic cytokines such as IL-8 induce  
292 chemotaxis, leukocyte activation and granule exocytosis, all of which increase chronic  
293 inflammation and intestinal tissue destruction in IBD (57).

294 The GC-MS and LC-MS analyses of these two anti-colitic somatic extracts (SE-MeOH and  
295 SE-HDA) revealed the presence of 32 small metabolites including eight medium-long chain fatty  
296 acids and seven SCFA. Some SM detected here such as ficusin, naphthalene derivative, methyl  
297 behenate and hentriacontanes are compounds known only from plants, and they are unlikely to be

298 synthesized by nematodes. Their putative appearance in these two helminths suggest the dietary  
299 exposure of the host animals from which the hookworms were obtained. These SM are tentative  
300 assignments pending MS-MS/NMR confirmation of proposed structures. From the whole worm  
301 somatic tissue extract of *A. caninum*, we identified 47 polar metabolites (glycine as the major  
302 amino acid), 22 fatty acids (stearic acid and methyl palmitate as major components) and four  
303 SCFA (isovalerate as the major SCFA). The presence of a large number of polar metabolites was  
304 consistent with the known dependence of these parasites on glucose metabolism, glycogen  
305 synthesis, oxidative metabolism and phosphorylation (58-62). Palmitic acid and stearic acid were  
306 the most common saturated fatty acids present in all the hookworm extracts. Palmitic acid is the  
307 primary fatty acid from which other longer fatty acids are synthesized. Linoleic acid is found  
308 mostly in plant glycosides and is used by animals in the biosynthesis of prostaglandins (via  
309 arachidonic acid) and cell membranes (63). SCFA, including acetic, propionic, methylbutyric, *n*-  
310 valeric and methylvaleric acids, were first reported in 1965 (64) from the cuticle, muscle and  
311 reproductive systems of *A. lumbricoides*. Our findings concur with previous findings (62) on the  
312 presence of SCFA in the ES products of *A. caninum*, where volatile SCFA such as acetic,  
313 propionic, isobutyric and branched chain C<sub>5</sub> acids were detected (62). More recently, saturated  
314 fatty acids were reported from the ova of *A. caninum* (65), but the authors did not report the  
315 presence of SCFA.

316 The nature and origin of these excreted SCFA of *A. caninum* were demonstrated through  
317 carbon (D-glucose-<sup>14</sup>C) isotope/radiocarbon labeling, and indicated the presence of a glucose  
318 metabolism intermediate between that observed in aerobes and that characteristic of helminth  
319 anaerobes (62). The importance of SCFA as intermediates in the energy metabolism of intestinal  
320 parasites in a succinate decarboxylase-dependent manner, as well as uncoupled mitochondrial  
321 respiration, has been reported (66). A recent review (67) suggested that formation and excretion  
322 of acetate as a metabolic end product of energy metabolism occurs in many protist (*Giardia*

323 *lamblia*, *Entamoeba histolytica*, *Trichomonas vaginalis*, *Trypanosoma* and *Leishmania* spp.) and  
324 helminth (*Fasciola hepatica*, *Haemonchus contortus* and *Ascaris suum*) parasites from acetyl-  
325 CoA by two different reactions, both involving substrate level phosphorylation that is catalyzed  
326 by either a cytosolic acetyl-CoA synthetase or an organellar acetate:succinate CoA-transferase.  
327 However, these enzymes involved in SCFA biosynthesis were poorly represented when we  
328 mapped them against the known metabolic pathways (KEGG) of 81 worm genomes including the  
329 human hookworm, *Necator americanus*, and the model free-living nematode, *C. elegans*. None of  
330 the hookworm species represented in genome databases have any annotation associated with  
331 SCFA synthesis other than two enzymes involved in propanoate synthesis. It is known that  
332 parasitic helminths modulate intestinal inflammation *via* alteration of the composition of the gut  
333 microbiota. This mechanism has been demonstrated both in rodent models (68) and human  
334 studies where iatrogenic hookworm infection resulted in increased bacterial species richness and  
335 elevated production of SCFA (11, 69). It is apparent that the gut microbiome is a complex  
336 ecosystem with microbial syntrophy at the intestinal mucosal interface (70), and that SCFA such  
337 as acetate, butyrate and propionate are produced and utilized by bacteria, and benefit host  
338 epithelial cells by producing molecules like vitamin B<sub>12</sub> (71). SCFA are key metabolites and  
339 energy sources for commensal bacteria at the gut interface. Therefore, while it is possible that *A.*  
340 *caninum* synthesizes SCFA *de novo*, further studies will be needed to define the contribution of  
341 the commensal microbiome to SCFA synthesis in hookworms.

342         Analyses of the available literature on the biological activities of all the small molecules  
343 identified from the somatic tissue extracts of *A. caninum* showed that 11 polar metabolites (36-  
344 46), nine medium-long chain fatty acids (29-34, 47, 48), and three SCFA (35) have been  
345 previously isolated from different sources and have been found to exhibit anti-inflammatory  
346 activities. Of 23 anti-inflammatory small metabolites, only three compounds including one polar  
347 metabolite (glycine) and three SCFA (acetate, propionate and butyrate) were studied *in vivo*

348 against chemically- and stress-induced ulcers in the gastric mucosa (36). Fatty acids, especially  
349 SCFA, have roles in host defense against potential opportunistic or pathogenic microorganisms,  
350 and establish an immunoregulatory environment that protects against inflammation in both the  
351 gastrointestinal tract and distant sites including the lung and heart (68, 72-74). SCFA are  
352 particularly important for colon homeostasis (72). For example, butyrate nourishes the colonic  
353 mucosa, and butyrate administration confers beneficial effects against IBD (72, 75). A  
354 comparative *in vitro* study of acetate (C2:0), propionate and butyrate (C4:0) revealed that  
355 propionate and butyrate were equipotent, where as acetate was less effective against IBD (35).  
356 Butyrate and propionate have also been implicated in the maintenance of host immune function  
357 by signaling to epithelial cells, maintaining regulatory T cell populations and inhibiting  
358 macrophage activation (70, 71). It is possible that *A. caninum* may be actively skewing the  
359 microbiome towards an anti-inflammatory composition by enhancing tolerogenic immune  
360 crosstalk through SCFA production. Chronic infection with *H. polygyrus* altered the intestinal  
361 habitat, resulting in increased SCFA production that was transferrable via the microbiota alone,  
362 and was sufficient to mediate protection against allergic asthma (68). The resulting anti-  
363 inflammatory cytokine secretion and regulatory T cell suppressor activity required the G protein-  
364 coupled receptor (GPR)-41, further highlighting the essential role of SCFA produced by  
365 commensal microbe communities shaped by the presence of helminth infections.

366 In summary, this study demonstrates that the somatic LMWM extracts of *A. caninum* are  
367 diverse in nature and possess anti-inflammatory properties that can suppress colitis in mice and  
368 inflammatory cytokine production by human leukocytes. Of five extracts tested, SE-MeOH and  
369 SE-HDA significantly protected mice against chemically-induced colitis, which implied that  
370 methanol and HDA were the best solvents to extract bioactive metabolites from hookworm  
371 somatic tissues. Our GC-MS and LC-MS analyses highlighted the presence of multiple small  
372 molecules in these fractions. Several of these metabolites, including the SCFA, have been



373 previously shown to have anti-inflammatory properties in various target diseases, including IBD.  
374 It is possible that these anti-inflammatory small molecules, either individually or in synergy, are  
375 responsible for the anti-inflammatory properties of SE-MeOH and SE-HDA extracts of *A.*  
376 *caninum*. Future work will entail purification and isolation of the bioactive metabolites, synthesis  
377 of the candidate components, and detailed pharmacotherapeutic assessment of the anti-colitic  
378 properties of the candidate compounds using a chronic immunologic mouse model of colitis.  
379 Moreover, while it is difficult to obtain large quantities of hookworm ESP, efforts should be  
380 invested in further isolating the ESP metabolomes with a focus on understanding the source and  
381 nature of SCFA, given that these compounds have specifically evolved to interact with host  
382 tissues and play important roles in regulating inflammation.

383

## 384 **MATERIALS AND METHODS**

385 **Hookworm collection.** *A. caninum* adult worms were collected with clockmaker tweezers  
386 from the small intestine of infected dogs and transferred to pre-warmed culture media (2%  
387 Glutamax in phosphate buffered saline (PBS), 5% antibiotic/antimycotic [AA]) in 50 ml falcon  
388 tubes. *A. caninum* adult worms were thoroughly washed with 5× antimycotic/antibiotic solution  
389 to purge bacterial contaminants and were cultured (50 worms per dish) in a single component  
390 Glutamax medium (2% Glutamax in PBS supplemented with 2× AA) for 2 h at 37°C in 5% CO<sub>2</sub>  
391 to allow regurgitation/defecation of the host blood meal and other material (including bacteria)  
392 that may have been acquired from the dog host gut. The worms were then snap-frozen in liquid  
393 nitrogen until further use.

394 **Preparation of hookworm somatic extracts.** The adult worms were frozen with liquid  
395 nitrogen and made into powder using a mortar and pestle. The powder was first soaked in a  
396 solvent mixture of hexane:dichloromethane:acetonitrile (1:1:1 v/v, 6 ml/g; HDA) for 30 min and



397 was filtered (Whatman 4, Qualitative circles 185 mm, England International Ltd.). The extraction  
398 of cell material on filter paper was repeated three times with the same solvent. The filtrates were  
399 combined, centrifuged at 1,831 g (Rotina 420 R, Hettich Zentrifugen, Germany) for 20 minutes at  
400 4°C and the supernatant slowly transferred to round-bottom flasks. The solvent was removed  
401 using a Rotary Evaporator (G5 Heidolf CVC 3000 Vacuubrand) to obtain the somatic tissue  
402 HDA fraction (SE-HDA). The solid residue was snap-frozen in liquid nitrogen, powdered and  
403 extracted with dichloromethane (3×). The filtration, centrifugation and drying processes were  
404 repeated as above to obtain the DCM fraction (SE-DCM). The remaining somatic tissue was  
405 snap-frozen again, powdered and extracted with methanol to obtain the MeOH fraction (SE-  
406 MeOH). Remaining solid residue from this step was snap frozen and soaked in 5% HCL (pH 1-  
407 2). The supernatant was freeze-dried using a Scanvac Cool Safe to obtain acidified aqueous  
408 extract (SE-Acidic). The solid tissues were finally soaked in basified (NH<sub>4</sub>OH, pH 10-12) water,  
409 filtered and centrifuged at 1,831 g, and freeze-dried to obtain alkaline aqueous extract (SE-  
410 Basic). Stock concentrations of these extracts (1 mg/ml) were prepared by dissolving 1 mg of  
411 each extract in 20 µL of DMSO followed by addition of 980 µl of PBS. From each stock  
412 concentration, 50 µl was transferred to a vial and added to 150 µl of fresh PBS to make a total  
413 injectable volume of 200 µl/mouse. These extracts were assessed for efficacy in the TNBS  
414 model of acute colitis.

415 **Animal ethics, source and housing of mice.** The James Cook University (JCU) animal  
416 ethics committee approved all experimental work involving animals (Ethics approval number  
417 A2199). Mice were raised in cages in the JCU animal facility in compliance with the Australian  
418 Code of Practice for the Care and Use of Animals for Scientific Purposes, 7<sup>th</sup> edition, 2007 and  
419 the Queensland Animal Care and Protection Act 2001. Age-matched 5-week old male BALB/c  
420 mice were sourced from Animal Resources Centre (Perth, Australia), weighed, placed in cages (5  
421 mice per cage), and allowed to settle into the study facility for 4-5 days prior to the start of the

422 experiment. Animals were housed in a temperature (26°C) and humidity-controlled (40-70%)  
423 environment, exposed to a 12-hour day/night cycle, and provided with irradiated mouse chow  
424 supplied by Specialty Feeds (Glen Forrest, Western Australia) and autoclaved tap water *ad*  
425 *libitum*.

426 **Experimental design and induction of TNBS colitis.** We followed the modified  
427 experimental design and TNBS induction protocols described by us earlier (26). Mice were  
428 divided into three different groups as “Naïve”, “TNBS only” and “TNBS + Sample treatment”.  
429 This experiment was performed in duplicate (total n=10 mice/group). The samples were filtered  
430 using 0.22 µM sterile filters prior to intra-peritoneal (i.p) administration to mice. Each mouse in  
431 the “Sample treatment” groups (each group labelled as SE-HDA, SE-DCM, SE-MeOH, SE-  
432 Acidic and SE-Basic) received 50 µl of extract suspension/mouse by i.p. injection (Day 1). The  
433 TNBS only group was administered 200 µl of PBS/DMSO (1%). Twenty-four hours post sample  
434 administration (Day 2), the mice were anaesthetized by i.p. injection of anesthetic solution  
435 containing 50 mg/kg of ketamine and 5 mg/kg of xylazine. TNBS was administered by intra-  
436 rectal (i.r.) injection of 100 µl TNBS (2.5 mg/mouse) mixed with 50% ethanol using a soft  
437 catheter (Insyte Autoguard Shielded IV catheter 20G x 1" Pink; Becton Dickinson). Mice were  
438 kept inverted for 2 minutes to prevent leakage of TNBS and returned to their cages. Mice were  
439 monitored daily until euthanized at day 5.

440 **Monitoring colitis progression by clinical scoring.** Mice were clinically scored for  
441 weight loss, piloerection, mobility, fecal consistency and fecal pellet counts for 3 days following  
442 administration of TNBS. Each individual mouse was placed in a clean cage/open plastic jar and  
443 observed for 10 minutes to score the clinical symptoms. The changes in clinical signs of disease  
444 were scored from 0-2, 0 being normal and 2 being diseased. A score of “0” was given when the  
445 mice gained weight, “1” when weight remained the same and “2” upon losing weight. Mice with  
446 no piloerection scored “0,” mild piloerection over the neck as “1” and severe piloerection all over

447 the body as “2”. The mobility of a mouse was scored as “0” for normal, “1” for movement only  
448 after stimulation, and “2” for hunched posture with no movement around the cage, even after  
449 stimulation. For fecal consistency, normal feces were scored “0”, mild diarrhea was scored “1”  
450 and severe diarrhea with blood or no feces was scored “2”. After 10 minutes of isolation, the  
451 fecal pellets were counted (higher number of pellets indicated normal or mice recovering from  
452 chemical colitis).

453 **Assessing intestinal pathology and macroscopic scoring.** On day 5 post-TNBS  
454 administration, the mice were euthanized. Their colons (from cecum to rectum) were surgically  
455 removed, measured and assessed for changes in macroscopic appearance and pathological  
456 parameters including adhesions, bowel wall thickening and edema (scoring matrices of 0–3; 0 =  
457 normal, 1 = mild, 2 = moderate, and 3 = severe). The colons from each group were lined up on a  
458 clean surgical drape paper towel, their lengths measured and then transferred to a petri dish in  
459 sterile DPBS. The tissues were opened longitudinally, washed with DPBS, placed under a  
460 microscope (Olympus SZ61, 0.67–4.5×), observed for inflamed sections, and scored for  
461 ulceration (0 – 3).

462 **Evaluating colon histological structure.** The distal colon tissue sections (1 cm) that  
463 were harvested from mice were placed in 4% paraformaldehyde (1 ml) to fix tissue overnight at  
464 4°C and then transferred to 70% ethanol for storage. Tissue was embedded in paraffin and  
465 sectioned longitudinally for histology at 4 µm thickness. Sections were stained with hematoxylin  
466 and eosin (H/E), observed for histological changes by light microscopy and histological  
467 photomicrographs (×200) were captured. Each histological photomicrograph was blinded and  
468 then scored for changes in overall colon morphology and epithelial integrity. The cross-sections  
469 of the colon tissues were scored for inflammation, edema, hyperplasia, ulceration and number of  
470 goblets cells using a scoring matrix (76). An AxioCam Imager –M1 (MRC ZEISS) was used for

471 scoring the colon histology cross-sections.

472 **ELISAs and cytokine measurement of colon tissues.** Colon pieces (1 cm) were  
473 collected and placed in sterile 24 well tissue culture plates with 500  $\mu$ l of complete medium  
474 (RPMI containing 10% fetal bovine serum, 1% penicillin/streptomycin, 0.1%  $\beta$ -mercaptoethanol,  
475 1% HEPES buffer. Tissues were cultured for 24 h at 37°C (supplied with 5% CO<sub>2</sub>) after which  
476 supernatants were collected and stored at -80°C until further analysis. Colon culture supernatants  
477 were thawed and levels of cytokines were quantified using a sandwich enzyme-linked  
478 immunosorbent assay (ELISA) (Ready-SET-Go!, eBiosciences) following the manufacturer's  
479 instructions. OD<sub>490</sub> values were measured using a POLARstar Omega plate reader (BMG  
480 LABTECH) and were expressed as picogram (pg) of tissue weight per mL.

481 **Human PBMC collection and culture conditions.** The human blood used for this study  
482 was obtained from healthy volunteer donors. Written informed consent was obtained from each  
483 donor at the time of blood draw. Ethical approval for this research was obtained from the James  
484 Cook University Human Ethics Committee. PBMC were isolated from whole blood by density  
485 gradient centrifugation using Ficoll-Paque media. For induction of T cell cytokines, PBMC were  
486 activated with a cell stimulation cocktail of 50 ng/ml of phorbol 12- myristate 13-acetate (PMA)  
487 and 1  $\mu$ g/ml of ionomycin (eBioscience). PMA + ionomycin-stimulated cells were treated with  
488 20  $\mu$ g/ml of hookworm extracts (SE-HDA, SE-DCM, SE-MeOH) or remained untreated. For  
489 stimulation of myeloid-associated cytokines, PBMC were activated with 10 ng/ml  
490 lipopolysaccharide (LPS) (Sigma-Aldrich). LPS-stimulated PBMC were treated with 2-50  $\mu$ g/ml  
491 of hookworm extracts (SE-HDA, SE-DCM, SE-MeOH) or remained untreated. The cell culture  
492 plates were incubated overnight at 37°C and 6.5% CO<sub>2</sub>. After incubation, the samples were  
493 centrifuged at 1,500 g for 5 minutes and the culture supernatants were collected for cytokine  
494 analysis.

495 **BD™ Cytometric Bead Array.** IL-1 $\beta$ , IL-6, IL-12, TNF- $\alpha$  and MCP-1 from PBMC  
496 culture supernatant were quantified using a cytometric bead array (CBA) (BD™ Biosciences).  
497 The CBA assays were performed according to the manufacturer's instruction and run using a five  
498 laser Special Order LSRFortessa™ with HTS (BD Biosciences). Cytokine concentrations (pg/ml)  
499 were calculated based on the sample MFI compared to the cytokine standard curves. BD™ FCAP  
500 Array software version 3.0 was used for data analysis. Graphs and statistical analysis were  
501 produced using GraphPad Prism version 7.02 (GraphPad Software Inc).

502 **Cryomill somatic tissue extraction of adult worms for GC-MS metabolomics**  
503 **analysis.** Somatic tissue extract of adult *A. caninum* (10-20 mg) was snap-frozen in liquid  
504 nitrogen to arrest metabolic changes, placed in cryomill tubes, then suspended in 600  $\mu$ l  
505 extraction solution (methanol:water 3:1 (v/v) containing internal standards <sup>13</sup>C, <sup>15</sup>N-valine and  
506 <sup>13</sup>C-sorbitol). The sample was extracted using a Precellys 24 Cryolys unit (Bertin Technologies)  
507 at 6800 rpm, 3  $\times$  30 sec pulses, 45 second interval between pulses, temperature < -5°C (pre-  
508 chilled with liquid nitrogen). The homogenate was transferred to a fresh microfuge tube on ice  
509 and chilled chloroform (150  $\mu$ l) was added. The solution (chloroform:methanol:water 1:3:1 (v/v)  
510 monophasic mixture) was vortexed vigorously chilled on ice for 10 minutes with regular mixing  
511 and then centrifuged for 5 minutes at 0°C. The supernatant was transferred to a fresh 1.5 ml  
512 microfuge tube on ice and milli-Q water (300  $\mu$ L) was added to each tube to obtain a biphasic  
513 partition of the solution (chloroform:methanol:water 1:3:3 (v/v)). The sample was vortexed  
514 vigorously and then centrifuged at 0°C for a further 5 minutes.

515 For total fatty acid analyses, the bottom chloroform extract (45  $\mu$ l) was transferred to  
516 fresh tubes and 0.2M *m*-trifluoromethylphenyl trimethyl ammonium hydroxide (methprep) (5  $\mu$ l)  
517 was added. Samples (5 replicates) were mixed using a thermomixer at 750 rpm for 30 minutes at  
518 37°C. The samples were injected (2  $\mu$ l) into an Agilent 7000 triple quad GC-MS (1:10 split

519 injection, BPX70 60 m x 0.25 mm x 0.25  $\mu$ m column) and the raw data were obtained and  
520 processed.

521 **Derivatization method for targeted metabolite analysis using GC-MS.** The upper  
522 aqueous phase (methanol:water, ~900  $\mu$ l) was transferred to a fresh tube, then aliquoted (50  $\mu$ l)  
523 into a pulled point insert and dried in an evaporator (Christ RVC 2-33 CD, John Morris Scientific  
524 Australia) at 35°C. A further 50  $\mu$ l of the aqueous sample was added every 30-40 minutes until  
525 completely dry. Samples were dehydrated by adding 50  $\mu$ l anhydrous methanol, and then  
526 derivatized by addition of 20  $\mu$ l methoxyamine (30 mg/ml in pyridine, Sigma Aldrich/Merck) at  
527 37°C for 30 minutes, and then 20  $\mu$ l of *N,O*-Bis(trimethylsilyl) trifluoroacetamide (BSTFA) + 1%  
528 trimethylchlorosilane (TMCS) (ThermoFisher Scientific) was added prior to incubation at 37°C  
529 for 30 minutes. The derivatized sample (1  $\mu$ l) was analyzed using an Agilent 7890 GC-MS (5973  
530 MSD) (77). Chromatographic separation was achieved using an Agilent VF-5 ms column (30 m  $\times$   
531 0.25 mm  $\times$  0.25  $\mu$ m). Conditions for the oven were set at 35°C, held for 2 minutes, then ramped  
532 at 25°C/minute to 325°C and held for 5 minutes. Helium was used as the carrier gas at a flow rate  
533 of 1 ml/minute, with compounds being detected across the m/z range of 50–600 atomic mass unit  
534 (amu).

535 **GC-MS analyses of SE-HDA and SE-MeOH extracts using underivatized protocols.**  
536 We performed GC-MS analysis on the two bioactive extracts using methods described by us  
537 previously (78). The dried crude fractions were re-suspended in chloroform-methanol solvent  
538 (90%:10%) and were directly injected into a Shimadzu GC-2010 Plus system to analyse their  
539 chemical constituents. The GC system used helium as a carrier gas (1.22 mL/min, pressure 67.7  
540 kPa at 40°C in a constant total flow mode) and the separation was achieved using a DB-5 ms  
541 column (130 m length  $\times$  0.25 mm, i.d., 0.25  $\mu$ m, Phenomenex). Injector (injection – splitless  
542 mode) and detector temperatures were set at 225°C and 300°C, respectively. The starting oven  
543 temperature was programmed at 45°C with an increasing temperature of 3°C/minute until it

544 reached 100°C (hold time = 4 minutes) and final temperature of 240°C (hold time = 50 minutes).  
545 Similarly, the same equipment was programmed for the MS system (condition and column same as  
546 above) with a runtime of 90 minutes (ion source = 200°C, solvent cut time = 1 minute, threshold  
547 = 0, starting mass ( $m/z$ ) = 35 and maximum mass measured ( $m/z$ ) = 1000, acquisition mode =  
548 scan, scan speed = 3333). The GC-MS was acquired in scan mode producing a total ion  
549 chromatogram (TIC).

550 The chemical constituents were identified by comparing and matching the ion  
551 fragmentation patterns of the test sample compounds with the National Institute of Standards and  
552 Technology (NIST, USA) mass spectra library of GC-MS data. Each compound was then  
553 surveyed for erstwhile literature on their anti-inflammatory properties using SciFinder Scholar,  
554 PubMed and Google Scholar. Published studies reporting anti-inflammatory activities for each  
555 compound are cited in the relevant tables.

556 **Identification of SCFA using LC-MS protocols.** The SCFA in the protective SE-HDA  
557 and SE-MeOH extracts, and the whole worm extract of hookworms were analysed by LC-MS in  
558 accordance with previously described protocols (79). Samples were analyzed in triplicate. Known  
559 SCFA, including acetate, propionate, isobutyrate, butyrate, 2-methylbutyrate, isovalerate,  
560 valerate, 3-NPH, 2-methylvalerate, 3-methylvalerate, isocaproate, caproate and heptanoic acid  
561 were used as standards (5  $\mu$ M and 50  $\mu$ M concentrations). These SCFA were mapped against the  
562 existing 81 worm genome KEGG pathways to understand their biosynthetic nature.

563 **Statistical and data analyses.** The data from groups of mice from 2 independent  
564 experiments (N =10) were combined and the statistical analyses were performed using GraphPad  
565 Prism (version 7.0) as described earlier (76). Comparisons were made between the sample  
566 treatment + TNBS groups and the TNBS only group; P values of < 0.05 were considered  
567 significant. When determining the differences between more than two groups with equal numbers  
568 of mice/samples, 2-way ANOVA was used. When two groups were compared a Mann-Whitney



569 (unpaired, non-parametric) t-test was applied. All results reported denote mean  $\pm$  standard error  
570 of the mean (SEM). The metabolomics data was analyzed in a targeted approach using Agilent's  
571 Mass Hunter Quantitative Analysis software (v.7). Target ion peak areas for polar and non-polar  
572 metabolites were extracted using the in-house Metabolomics Australia metabolite library and  
573 were integrated and output as a data matrix for further analysis (section 3.5).

574

## 575 **ACKNOWLEDGMENTS**

576 This study was supported by a NHMRC Peter Doherty Early Career Researcher  
577 Fellowship (APP1091011) and AITHM Capacity Development Grant to P.W; a NHMRC  
578 program grant APP1037304 and NHMRC Senior Principal Research Fellowship (APP1117504)  
579 to A.L; and a NHMRC Career Development Fellowship (APP1131732) to J.J.M.

580 We thank Dr. Makedonka Mitreva for hookworm genome analyses, Dr. Severine Navarro,  
581 Mr. Atik Susianto, Dr. Komal Kanojia, Dr. Vinod Narayana and Mr. Bjoernar Hauge for  
582 assistance with cytokine analyses, SCFA method development for hookworm extracts and animal  
583 husbandry.

584

## 585 **REFERENCES**

586

- 587 1. Crohn's & Colitis Foundation of America. 2014. The facts about inflammatory bowel  
588 diseases. Crohn's & Colitis Foundation of America, New York.
- 589 2. Crohn's & Colitis Australia. 2014. Annual Report 2012-2013. Australia.
- 590 3. Ng CS. 2016. Emerging trends of inflammatory bowel disease in Asia. Gastroenterol  
591 Hepatol 12:193-196.
- 592 4. Jose FA, Heyman MB. 2008. Extraintestinal manifestations of inflammatory bowel  
593 disease. J Pediatr Gastroenterol Nutr 46:124-133.



- 594 5. Szigethy E. 2016. Gut feelings. *Nature* S113.
- 595 6. Niewiadomski O, Studd C, Hair C, Wilson J, Ding NS, Heerasing N, Ting A, McNeill J,  
596 Knight R, Santamaria J, Prewett E, Dabkowski P, Dowling D, Alexander S, Allen B,  
597 Popp B, Connell W, Desmond P, Bell S. 2015. Prospective population-based cohort of  
598 inflammatory bowel disease in the biologics era: Disease course and predictors of  
599 severity. *J Gastroenterol Hepatol* 30:1346-53.
- 600 7. Brown C, Gibson PR, Hart A, Kaplan GG, Kachroo S, Ding Q, Hautamaki E, Fan T,  
601 Black CM, Hu X, Beusterien K. 2015. Long-term outcomes of colectomy surgery among  
602 patients with ulcerative colitis. *Springerplus* 4:573.
- 603 8. Neurath MF. 2017. Current and emerging therapeutic targets for IBD. *Nat Rev*  
604 *Gastroenterol Hepatol* 14:688.
- 605 9. Daveson J, Jones DM, Gaze S, McSorley H, Clouston A, Pascoe A, Cooke S, Speare R,  
606 Macdonald GA, Anderson R, McCarthy JS, Loukas A, Croese J. 2011. Effect of  
607 hookworm infection on wheat challenge in celiac disease-a randomised double-blinded  
608 placebo controlled trial. *PLoS One* 6:e17366.
- 609 10. Gaze S, McSorley HJ, Daveson J, Jones D, Bethony JM, Oliveira LM, Speare R,  
610 McCarthy JS, Engwerda CR, Croese J, Loukas A. 2012. Characterising the mucosal and  
611 systemic immune responses to experimental human hookworm infection. *PLoS Pathog*  
612 8:e1002520.
- 613 11. Giacomini P, Zakrzewski M, Croese J, Su X, Sotillo J, McCann L, Navarro S, Mitreva M,  
614 Krause L, Loukas A, Cantacessi C. 2015. Experimental hookworm infection and  
615 escalating gluten challenges are associated with increased microbial richness in celiac  
616 subjects. *Sci Rep* 18:13797.
- 617 12. McSorley HJ, Gaze S, Daveson J, Jones D, Anderson RP, Clouston A, Ruysers NE,  
618 Speare R, McCarthy JS, Engwerda CR, Croese J, Loukas A. 2011. Suppression of

- 619 inflammatory immune responses in celiac disease by experimental hookworm infection.  
620 PLoS One 6:e24092.
- 621 13. Smallwood TB, Giacomini PR, Loukas A, Mulvenna JP, Clark RJ, Miles JJ. 2017.  
622 Helminth immunomodulation in autoimmune disease. Front Immunol 8:453.
- 623 14. Blount J, Hooi D, Feary J, Venn A, Telford G, Brown A, Britton J, Pritchard D. 2009.  
624 Immunologic profiles of persons recruited for a randomized, placebo-controlled clinical  
625 trial of hookworm infection. Am J Trop Med Hyg 81:911-916.
- 626 15. Geiger SM, Fujiwara RT, Santiago H, Corrêa-Oliveira R, Bethony JM. 2008. Early stage-  
627 specific immune responses in primary experimental human hookworm infection.  
628 Microbes Infect 10:1524-1535.
- 629 16. Croese J, O'neil J, Masson J, Cooke S, Melrose W, Pritchard D, Speare R. 2006. A proof  
630 of concept study establishing *Necator americanus* in Crohn's patients and reservoir  
631 donors. Gut 55:136-137.
- 632 17. Loukas A, Hotez PJ, Diemert D, Yazdanbakhsh M, McCarthy JS, Correa-Oliveira R,  
633 Croese J, Bethony JM. 2016. Hookworm infection. Nat Rev Dis Primers 2:16088.
- 634 18. Yazdanbakhsh M, Kreamsner PG, van Ree R. 2002. Allergy, parasites, and the hygiene  
635 hypothesis. Science 296:490-494.
- 636 19. Ruysers NE, De Winter BY, De Man JG, Loukas A, Pearson MS, Weinstock JV, Van  
637 den Bossche RM, Martinet W, Pelckmans PA, Moreels TG. 2009. Therapeutic potential  
638 of helminth soluble proteins in TNBS-induced colitis in mice. Inflamm Bowel Dis  
639 15:491.
- 640 20. Ferreira I, Smyth D, Gaze S, Aziz A, Giacomini P, Ruysers N, Artis D, Laha T, Navarro  
641 S, Loukas A, McSorley HJ. 2013. Hookworm excretory/secretory products induce  
642 interleukin-4 (IL-4)+ IL-10+ CD4+ T cell responses and suppress pathology in a mouse  
643 model of colitis. Infect Immun 81:2104-2111.

- 644 21. Mulvenna J, Hamilton B, Nagaraj SH, Smyth D, Loukas A, Gorman JJ. 2009. Proteomics  
645 analysis of the excretory/secretory component of the blood-feeding stage of the  
646 hookworm, *Ancylostoma caninum*. Mol Cell Proteomics 8:109-21.
- 647 22. Navarro S, Pickering DA, Ferreira IB, Jones L, Ryan S, Troy S, Leech A, Hotez PJ, Zhan  
648 B, Laha T, Prentice R, Sparwasser T, Croese J, Engwerda CR, Upham JW, Julia V,  
649 Giacomini PR, Loukas A. 2016. Hookworm recombinant protein promotes regulatory T  
650 cell responses that suppress experimental asthma. Sci Transl Med 8:362ra143.
- 651 23. Ferreira IB, Pickering DA, Troy S, Croese J, Loukas A, Navarro S. 2017. Suppression of  
652 inflammation and tissue damage by a hookworm recombinant protein in experimental  
653 colitis. Clin Transl Immunology 6:e157.
- 654 24. Shepherd C, Navarro S, Wangchuk P, Wilson D, Daly NL, Loukas A. 2015. Identifying  
655 the immunomodulatory components of helminths. Parasite Immunol 37:293-303.
- 656 25. Kaplan F, Srinivasan J, Mahanti P, Ajredini R, Durak O, Nimalendran R, Sternberg PW,  
657 Teal PE, Schroeder FC, Edison AS, Alborn HT. 2011. Ascaroside expression in  
658 *Caenorhabditis elegans* is strongly dependent on diet and developmental stage. PLoS One  
659 6:e17804.
- 660 26. Wangchuk P, Navarro S, Shepherd C, Keller PA, Pyne SG, Loukas A. 2015. Diterpenoid  
661 alkaloids of *Aconitum laciniatum* and mitigation of inflammation by 14-*O*-acetylneoline  
662 in a murine model of ulcerative colitis. Sci Rep 5:12845.
- 663 27. Wangchuk P, Samten. 2015. GC-FID coupled GC-MS analysis of the essential oil and the  
664 recorded biological activities of *Meconopsis simplicifolia*. J Biologic Active Prod Nature  
665 5:365-372.
- 666 28. Stein SE. 2014. NIST Standard Reference Database 1A v14 National Institute of  
667 Standards and Technology, Gaithersburg.

- 668 29. Ahmad M, Baba WN, Gani A, Wani TA, Gani A, Masoodi FA. 2015. Effect of extraction  
669 time on antioxidants and bioactive volatile components of green tea (*Camellia sinensis*),  
670 using GC/MS. *Cogent Food Agric* 1:1106387.
- 671 30. Aparna V, Dileep KV, Mandal PK, Karthe P, Sadasivan C, Haridas M. 2012. Anti-  
672 Inflammatory property of *n*-hexadecanoic acid: structural evidence and kinetic  
673 assessment. *Chem Biol Drug Des* 80:434-439.
- 674 31. El-Demerdash E. 2011. Anti-inflammatory and antifibrotic effects of methyl palmitate.  
675 *Toxicol Appl Pharmacol* 254:238-244.
- 676 32. Kim DH, Yoo TH, Lee SH, Kang HY, Nam BY, Kwak SJ, Kim JK, Park JT, Han SH,  
677 Kang SW. 2012. Gamma linolenic acid exerts anti-inflammatory and anti-fibrotic effects  
678 in diabetic nephropathy. *Yonsei Med J* 53:1165-1175.
- 679 33. Morse N. 2015. Lipid-lowering and anti-inflammatory effects of palmitoleic acid:  
680 Evidence from preclinical and epidemiological studies. *Lipid Technol* 27:107-111.
- 681 34. Gopalakrishnan S, Vadivel E. 2011. GC-MS analysis of some bioactive constituents of  
682 *Mussaenda frondosa* Linn. *Int J Pharma Biosci* 2:313-320.
- 683 35. Tedelind S, Westverg F, Kjerrulf M, Vidal A. 2007. Anti-inflammatory properties of the  
684 short-chain fatty acids acetate and propionate: A study with relevance to inflammatory  
685 bowel disease. *World J Gastroenterol* 13:2826-2832.
- 686 36. Zhong Z, Wheeler MD, Li X, Froh M, Schemmer P, Yin M, Bunzendaul H, Bradford B,  
687 Lemasters JJ. 2003. L-Glycine: a novel antiinflammatory, immunomodulatory, and  
688 cytoprotective agent. *Curr Opin Clin Nutr Metab Care* 6:229-40.
- 689 37. Saxena RN, Pendse VK, Khanna NK. 1984. Anti-inflammatory and analgesic properties  
690 of four amino-acids. *Indian J Physiol Pharmacol* 28:299-305.

- 691 38. Mine Y, Zhang H. 2015. Anti-inflammatory effects of poly-L-lysine in intestinal mucosal  
692 system mediated by calcium-sensing receptor activation. *J Agric Food Chem* 63:10437-  
693 47.
- 694 39. Han D, Kim HY, Lee HJ, Shim I, Hahm DH. 2007. Wound healing activity of gamma-  
695 aminobutyric acid (GABA) in rats. *J Microbiol Biotechnol* 17:1661-1669.
- 696 40. Cavone L, Calosi L, Cinci L, Moroni F, Chiarugi A. 2012. Topical mannitol reduces  
697 inflammatory edema in a rat model of arthritis. *Pharmacology* 89:18-21.
- 698 41. Ueki M, Ueno M, Morishita J, Maekawa N. 2013. D-ribose ameliorates cisplatin-induced  
699 nephrotoxicity by inhibiting renal inflammation in mice. *Tohoku J Exp Med* 229:195-201.
- 700 42. Echigo R, Shimohata N, Karatsu K, Yano F, Kayasuga-Kariya Y, Fujisawa A, Ohto T,  
701 Kita Y, Nakamura M, Suzuki S, Mochizuki M, Shimizu T, Chung U, Sasaki N. 2012.  
702 Trehalose treatment suppresses inflammation, oxidative stress, and vasospasm induced by  
703 experimental subarachnoid hemorrhage. *J Transl Med* 10:80.
- 704 43. Hasegawa S, Ichiyama T, Sonaka I, Ohsaki A, Okada S, Wakiguchi H, Kudo K, Kittaka  
705 S, Hara M, Furukawa S. 2012. Cysteine, histidine and glycine exhibit anti-inflammatory  
706 effects in human coronary arterial endothelial cells. *Clin Exp Immunol* 167:269-274.
- 707 44. Cicko S, Grimm M, Ayata K, Beckert J, Meyer A, Hossfeld M, Zissel G, Idzko M, Müller  
708 T. 2015. Uridine supplementation exerts anti-inflammatory and anti-fibrotic effects in an  
709 animal model of pulmonary fibrosis. *Respir Res* 16:105.
- 710 45. Unnikrishnan MK, Rao MN. 1990. Antiinflammatory activity of methionine, methionine  
711 sulfoxide and methionine sulfone. *Agents Actions* 31:110-2.
- 712 46. Abdel-Salam OM, Youness ER, Mohammed NA, Morsy SM, Omara EA, Sleem AA.  
713 2014. Citric acid effects on brain and liver oxidative stress in lipopolysaccharide-treated  
714 mice. *J Med Food* 17:588-598.

- 715 47. Huang WC, Tsai TH, Chuang LT, Li YY, Zouboulis CC, Tsai PJ. 2014. Antibacterial and  
716 anti-inflammatory properties of capric acid against propionibacterium acnes: A  
717 comparative study with lauric acid. *J Dermatol Sci* 73:232-240.
- 718 48. Hoshimoto A, Suzuki Y, Katsuno T, Nakajima H, Saito Y. 2002. Caprylic acid and  
719 medium-chain triglycerides inhibit IL-8 gene transcription in Caco-2 cells: comparison  
720 with the potent histone deacetylase inhibitor trichostatin A. *Br J Pharmacol* 136:280-286.
- 721 49. Varyani F, Fleming JO, Maizels RM. 2017. Helminths in the gastrointestinal tract as  
722 modulators of immunity and pathology. *Am J Physiol Gastrointest Liver Physiol*  
723 312:G537-G549.
- 724 50. Leung J, Hang L, Blum A, Setiawan T, Stoyanoff K, Weinstock J. 2012.  
725 *Heligmosomoides polygyrus* abrogates antigen-specific gut injury in a murine model of  
726 inflammatory bowel disease. *Inflamm Bowel Dis* 18:1447-1455.
- 727 51. Reardon C, Sanchez A, Hogaboam CM, McKay DM. 2001. Tapeworm infection reduces  
728 epithelial ion transport abnormalities in murine dextran sulfate sodium-induced colitis.  
729 *Infect Immun* 69:4417-4423.
- 730 52. Weinstock JV, Elliott DE. 2013. Translatability of helminth therapy in inflammatory  
731 bowel diseases. *Int J Parasitol* 43:245-251.
- 732 53. Yang X, Yang Y, Wang Y, Zhan B, Gu Y, Cheng Y, Zhu X. 2014. Excretory/secretory  
733 products from *Trichinella spiralis* adult worms ameliorate DSS-induced colitis in mice.  
734 *PLoS One* 9:e96454.
- 735 54. Maizels RM. 2016. Parasitic helminth infections and the control of human allergic and  
736 autoimmune disorders. *Clin Microbiol Infect* 22:481-6.
- 737 55. Ferreira IB, Pickering DA, Troy S, Croese J, Loukas A, Navarro S. 2017. Suppression of  
738 inflammation and tissue damage by a hookworm recombinant protein in experimental  
739 colitis. *Clin Transl Immunology* 6:e157.

- 740 56. Cançado GG, Fiuza JA, de Paiva NC, Lemos Lde C, Ricci ND, Gazzinelli-Guimarães PH,  
741 Martins VG, Bartholomeu DC, Negrão-Corrêa DA, Carneiro CM, Fujiwara RT. 2011.  
742 Hookworm products ameliorate dextran sodium sulfate-induced colitis in BALB/c mice.  
743 *Inflamm Bowel Dis* 17:2275-86.
- 744 57. MacDermott RP, Sanderson IR, HC. R. 1998. The central role of chemokines  
745 (chemotactic cytokines) in the immunopathogenesis of ulcerative colitis and Crohn's  
746 disease. *Inflamm Bowel Dis* 4:54-67.
- 747 58. Fernando MA, Wong HA. 1964. Metabolism of hookworms. II. Glucose metabolism and  
748 glycogen synthesis in adult female *Ancylostoma caninum*. *Exp Parasitol* 15:284-292.
- 749 59. Warren LG, Karlsson EL. 1965. Biochemistry of the dog hookworm. I. Oxidative  
750 metabolism. *Exp Parasitol* 17:1-19.
- 751 60. Warren LG. 1970. Biochemistry of the dog hookworm. III. Oxidative phosphorylation.  
752 *Exp Parasitol* 27:417-423.
- 753 61. Gimenez ME, Gimenez A, Gaede K. 1967. Metabolic transformation of <sup>14</sup>C-Glucose into  
754 tissue proteins of *Ancylostoma caninum*. *Exp Parasitol* 21:215-223.
- 755 62. Warren LG, Poole WJ. 1970. Biochemistry of the dog hookworm II. Nature and origin of  
756 the excreted fatty acids. *Exp Parasitol* 27:408-416.
- 757 63. National Center for Biotechnology Information. Linoleic acid. PubChem Compound  
758 Database; CID=5280450, <https://pubchem.ncbi.nlm.nih.gov/compound/5280450>  
759 (accessed Apr. 16, 2018).
- 760 64. Beames CGJ. 1965. Neutral lipids of *Ascaris lumbricoides* with special reference to the  
761 esterified fatty acids. *Exp Parasitol* 16:291-9.
- 762 65. Gyawali P, Beale DJ, Ahmed W, Karpe AV, Magalhaes RJ. 2016. Determination of  
763 *Ancylostoma caninum* ova viability using metabolic profiling. *Parasitol Res* 115:3485-  
764 3492.

- 765 66. Saz HJ. 1981. Energy metabolisms of parasitic helminths: adaptations to parasitism. Ann  
766 Rev Physiol 43:323-341.
- 767 67. Tielens AGM, van Grinsven KWA, Henze K, van Hellemond JJ, Martin W. 2010. Acetate  
768 formation in the energy metabolism of parasitic helminths and protists. Int J Parasitol  
769 40:387-397.
- 770 68. Zaiss MM, Rapin A, Lebon L, Dubey LK, Mosconi I, Sarter K, Piersigilli A, Menin L,  
771 Walker AW, Rougemont J, Paerewijck O, Geldhof P, McCoy KD, Macpherson AJ,  
772 Croese J, Giacomini PR, Loukas A, Junt T, Marsland BJ, Harris NL. 2015. The intestinal  
773 microbiota contributes to the ability of helminths to modulate allergic inflammation.  
774 Immunity 43:998-1010.
- 775 69. Cantacessi C, Giacomini P, Croese J, Zakrzewski M, Sotillo J, McCann L, Nolan MJ,  
776 Mitreva M, Krause L, Loukas A. 2014. Impact of experimental hookworm infection on  
777 the human gut microbiota. J Infect Dis 210:1431-4.
- 778 70. Smith PM, Howitt MR, Panikov N, Michaud M, Gallini CA, Bohlooly YM, Glickman  
779 JN, Garrett WS. 2013. The microbial metabolites, short-chain fatty acids, regulate colonic  
780 Treg cell homeostasis. Science 341:596-573.
- 781 71. Belzer C, Chia LW, Aalvink S, Chamlaqain B, Piironen V, Knol JC, de Vos WM. 2017.  
782 Microbial metabolic networks at the mucus layer lead to diet-independent butyrate and  
783 vitamin B12 production by intestinal symbionts. MBio 8:e00770-17.
- 784 72. Wong JM, de Souza R, Kendall CW, Emam A, Jenkins DJ. 2006. Colonic health:  
785 fermentation and short chain fatty acids. J Clin Gastroenterol 40:235-243.
- 786 73. Greer JB, O'Keefe SJ. 2011. Microbial induction of immunity, inflammation, and cancer.  
787 Front Physiol 1:168.
- 788 74. Scheppach W. 1994. Effects of short chain fatty acids on gut morphology and function.  
789 Gut 35:S35-38.



- 790 75. Vinolo MAR, Rodrigues HG, Nachbar RT, Curi R. 2011. Regulation of inflammation by  
791 short chain fatty acids. *Nutrients* 3:858-876.
- 792 76. Shepherd C, Giacomini P, Miller C, Navarro S, Loukas A, Wangchuk P. 2018. A  
793 medicinal plant compound, capnoidine, prevents the onset of inflammation in a mouse  
794 model of colitis. *J Ethnopharmacol* 211:17-28.
- 795 77. Overgaard AJ, Weir JM, De Souza DP, Tull D, Haase C, Meikle PJ, Pociot F. 2016.  
796 Lipidomic and metabolomic characterization of a genetically modified mouse model of  
797 the early stages of human type 1 diabetes pathogenesis. *Metabolomics* 12.
- 798 78. Wangchuk P, Keller PA, Pyne SG, Taweechoatipatr M, Kamchonwongpaisan S. 2013.  
799 GC/GC-MS analysis, isolation and identification of bioactive essential oil components  
800 from the Bhutanese medicinal plant, *Pleurospermum amabile*. *Nat Prod Commun* 8:1308-  
801 08.
- 802 79. Han J, Lin K, Sequeira C, Borchers CH. 2015. An isotope-labeled chemical derivatization  
803 method for the quantitation of short-chain fatty acids in human feces by liquid  
804 chromatography–tandem mass spectrometry. *Anal Chim Acta* 854:86-94.

805

806

## 807 **Figure legends**

808

809 **FIG 1.** Protective effects of intra-peritoneal administration of somatic tissue metabolite extracts  
810 of *A. caninum* against different clinical symptoms of inducible colitis in mice (N = 10). (A)  
811 TNBS-induced body weight loss. (B) mobility score. (C) piloerection score. (D) fecal consistency  
812 score. (E) fecal pellet counts. Statistical analyses were performed using Graphpad Prism 7 (2way  
813 ANOVA and unpaired and nonparametric Mann-Whitney t-test, \*P < 0.05, \*\*P < 0.01, \*\*\*P <  
814 0.001, \*\*\*\*P < 0.0001).

815

816 **FIG 2.** Macroscopic pathology scores of mice treated with different somatic tissue LMWM  
817 extracts of *A. caninum* (N = 10). (A) colon length shortening; (B) colon wall thickening; (C)  
818 number of adhesions; (D) extent of edema (E); degree of ulceration. Statistical analyses was  
819 performed using Graphpad Prism 7 (unpaired and nonparametric Mann-Whitney t-test, \*P<0.05;  
820 \*\*P<0.01; \*\*\*P<0.001; \*\*\*\*P<0.0001).

821

822 **FIG 3.** Administration of SE-HDA and SE-MeOH protects mice against TNBS-induced colonic  
823 inflammation. (A) Representative histological photomicrographs of haematoxylin and eosin-  
824 stained (H/E) paraffin sections ( $\times 200$ ) of distal colon tissues of an untreated mouse with normal  
825 goblet cells (green arrow), lamina propria (black arrow) and colon wall (blue arrow); TNBS  
826 control mouse colon showed erosion of goblets cells (green arrow), thickening of lamina propria  
827 (black arrow), cell infiltration (red arrow) and colon wall thickening (blue arrow); mice treated  
828 with SE-HDA/TNBS and SE-MeOH/TNBS showed less pathology than the untreated TNBS only  
829 control group. Mice treated with SE-DCM/TNBS, SE-Acidic/TNBS and SE-Basic/TNBS extract  
830 were not protected against colitic immunopathology. (B) Scoring of histological outcomes of all  
831 treatment groups for pathological changes. Statistical analyses were performed using Graphpad  
832 Prism 7 (unpaired and nonparametric Mann-Whitney t-test, \*P < 0.05).

833

834 **FIG 4.** Cytokine profile of mice treated with somatic tissue extracts of *A. caninum* (n = 10). (A)  
835 IFN- $\gamma$  (P = 0.3538). (B) IL-17A (P = 0.1510). Statistical analyses were performed using  
836 Graphpad Prism 7 (unpaired and nonparametric Mann-Whitney t-test, P < 0.05 was considered  
837 significant).

838

839 **FIG 5.** Co-culture of human PBMC with *A. caninum*-derived SE-MeOH, SE-DCM and SE-HDA  
840 at a final concentration of 20 µg/ml prior to stimulation with LPS resulted in significant  
841 suppression of the pro-inflammatory cytokines IL-1β (A), IL-6 (B), TNF-α (C) and MCP-1 (D).  
842 Statistical analyses were performed using Graphpad Prism 7 (unpaired t-test, \*\*P < 0.001, \*\*\*\*P  
843 < 0.0001)

844

845 **FIG 6.** Dose-response effect of inflammatory cytokine and chemokine secretion by human  
846 PBMC in the presence of different concentrations of SE-HDA extract of *A. caninum*. Stimulation  
847 with LPS resulted in significant suppression of the pro-inflammatory cytokines IL-1β (A), IL-6  
848 (B), TNF-α (C), and MCP-1 (D). A multi-donor analysis showed SE-HDA induced significant  
849 suppression of IL-1β (E) and MCP-1 (F) in all 6 donors. Statistical analyses were performed  
850 using Graphpad Prism 7 (unpaired t-test, \*P<0.05; \*\*P<0.01; \*\*\*P<0.001; \*\*\*\*P<0.0001).

851

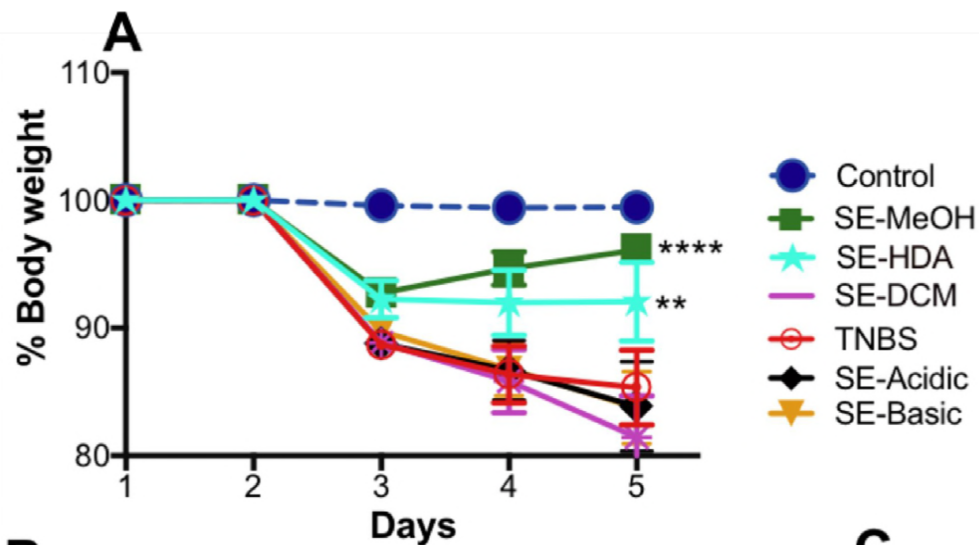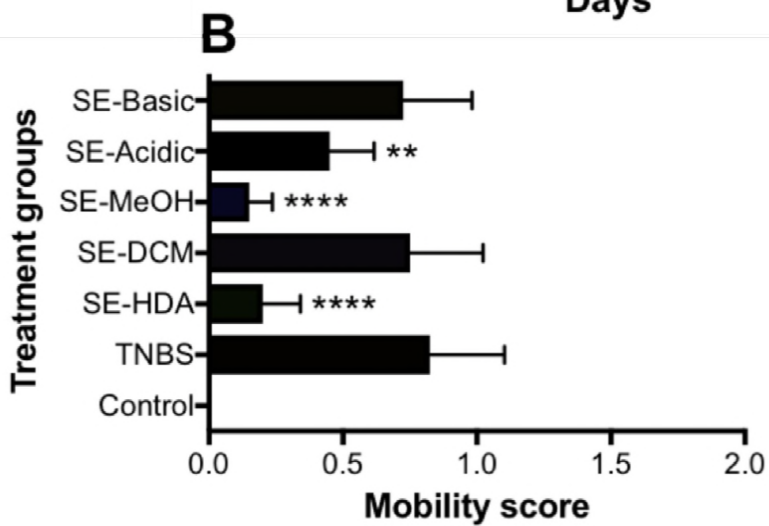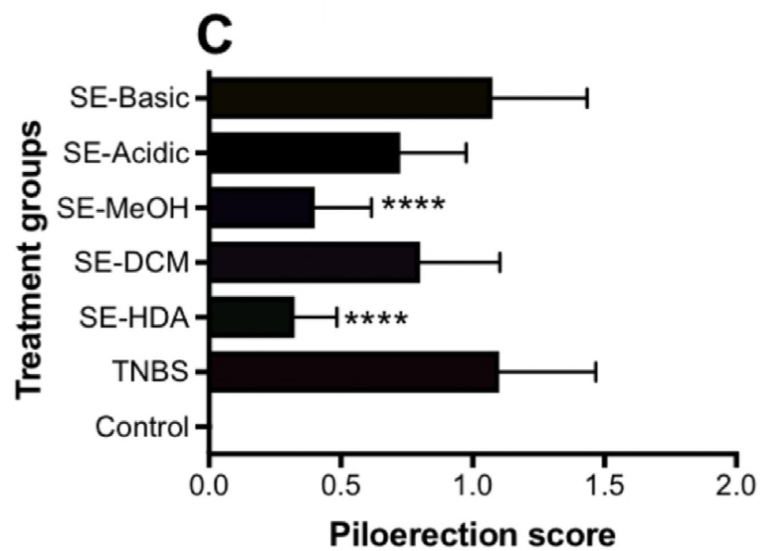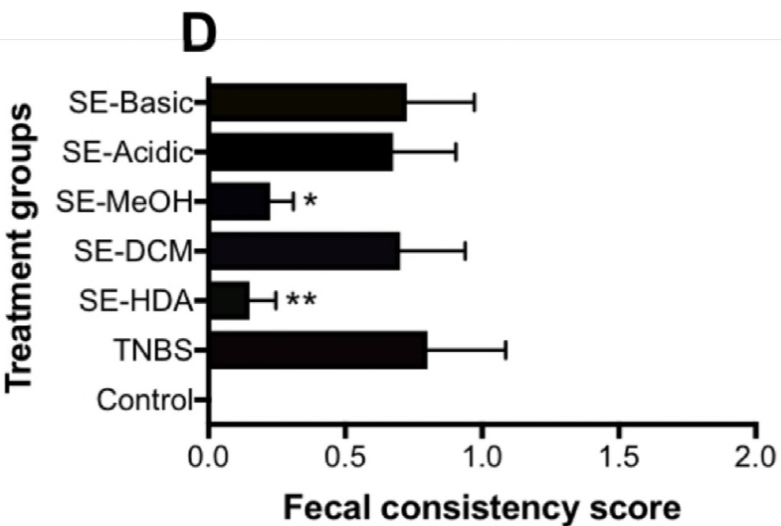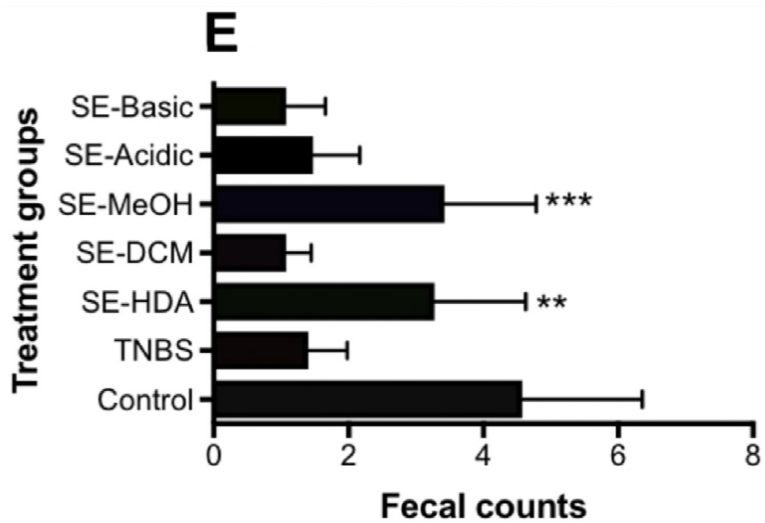

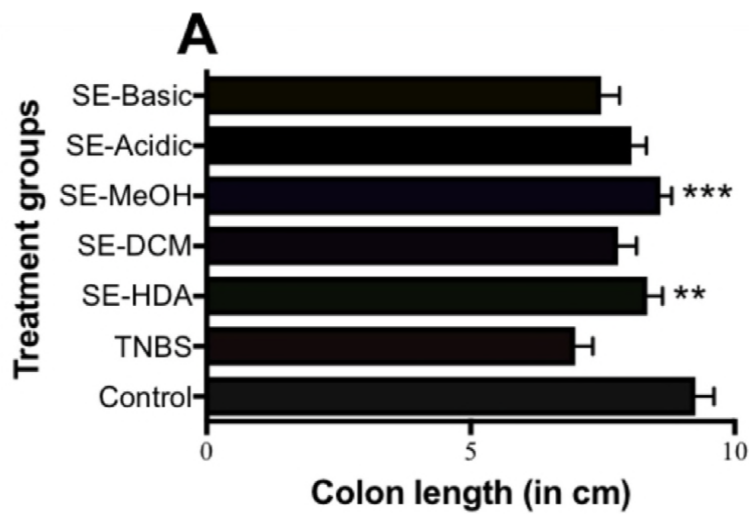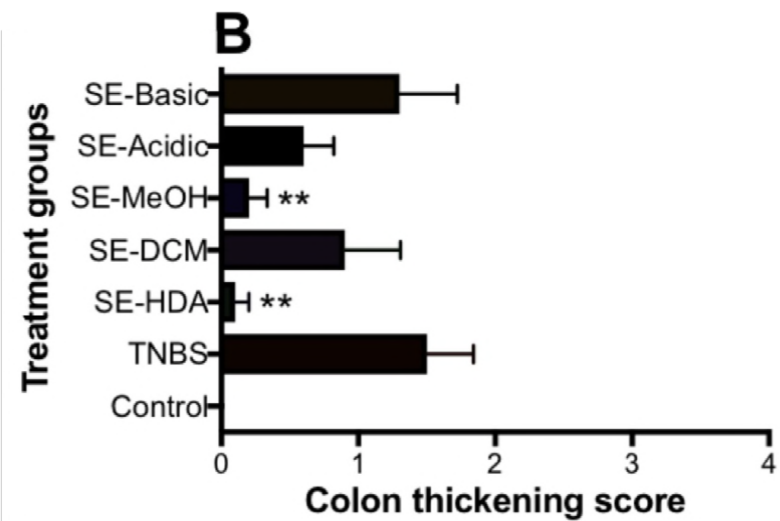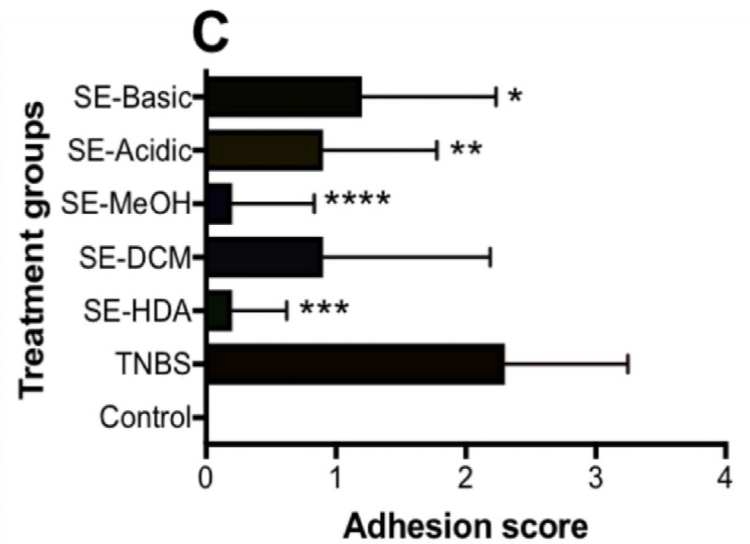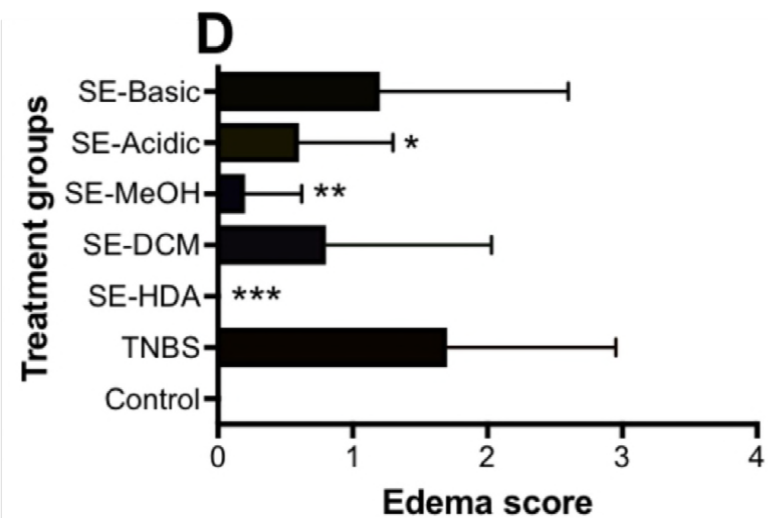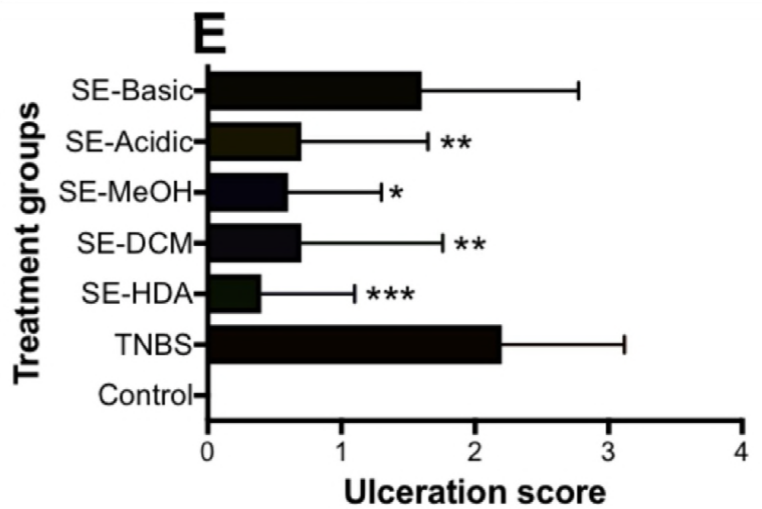



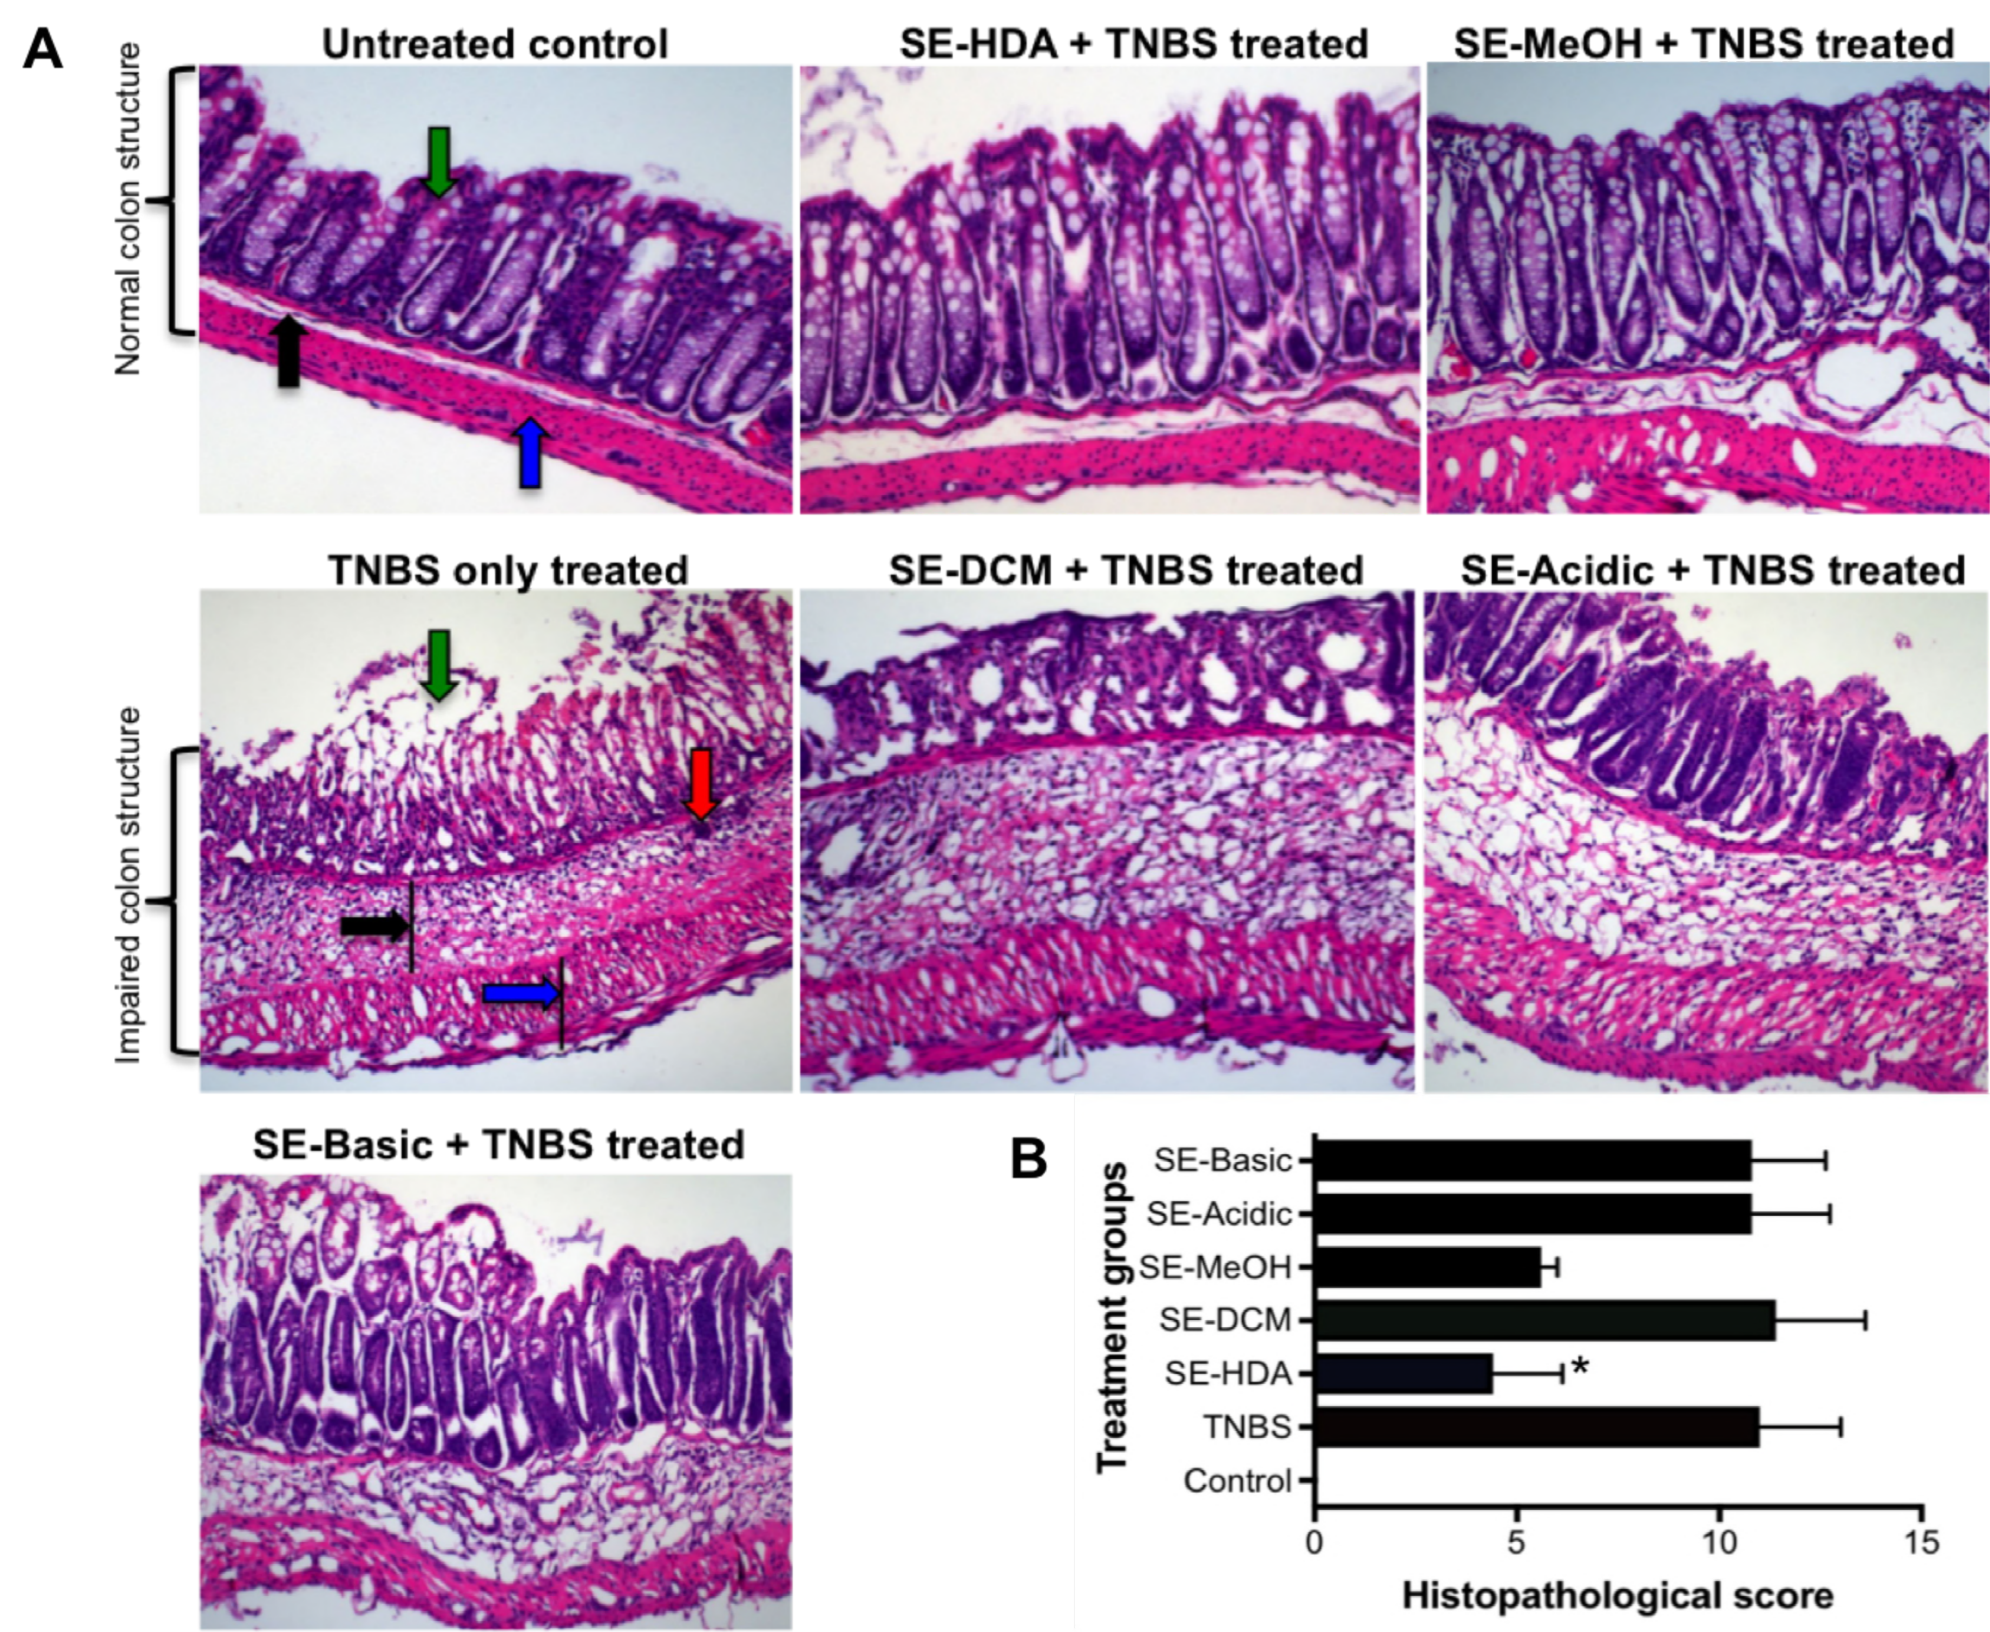

**A****Treatment groups**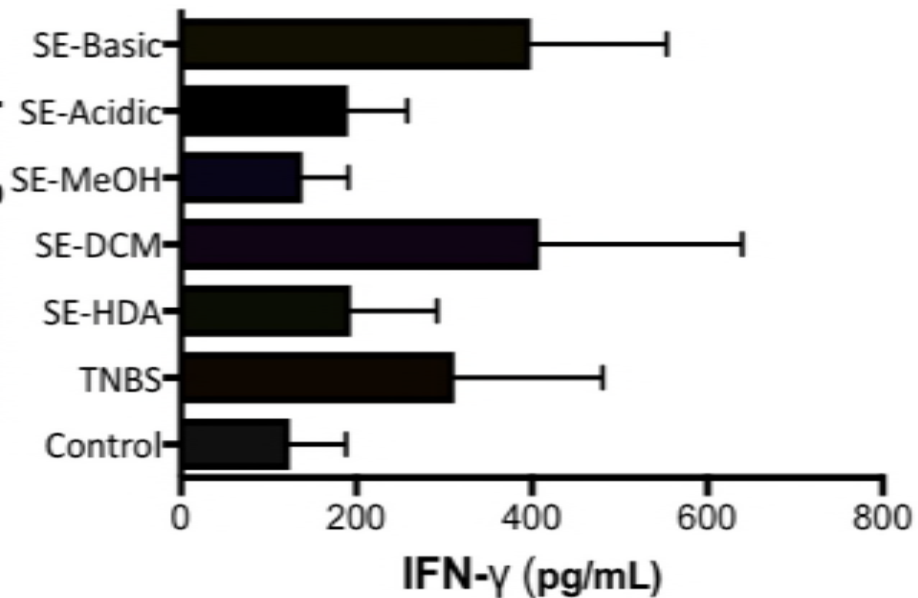**B****Treatment groups**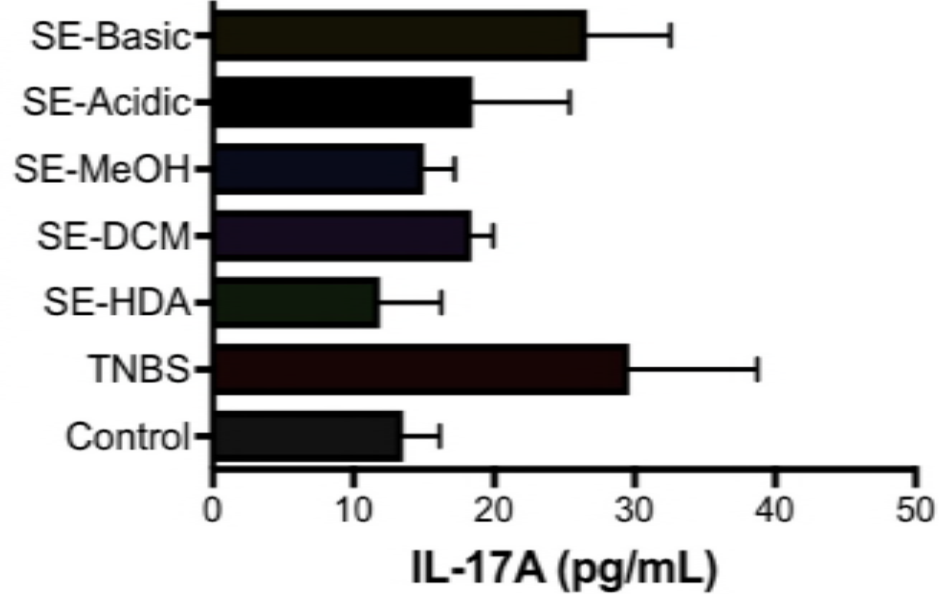

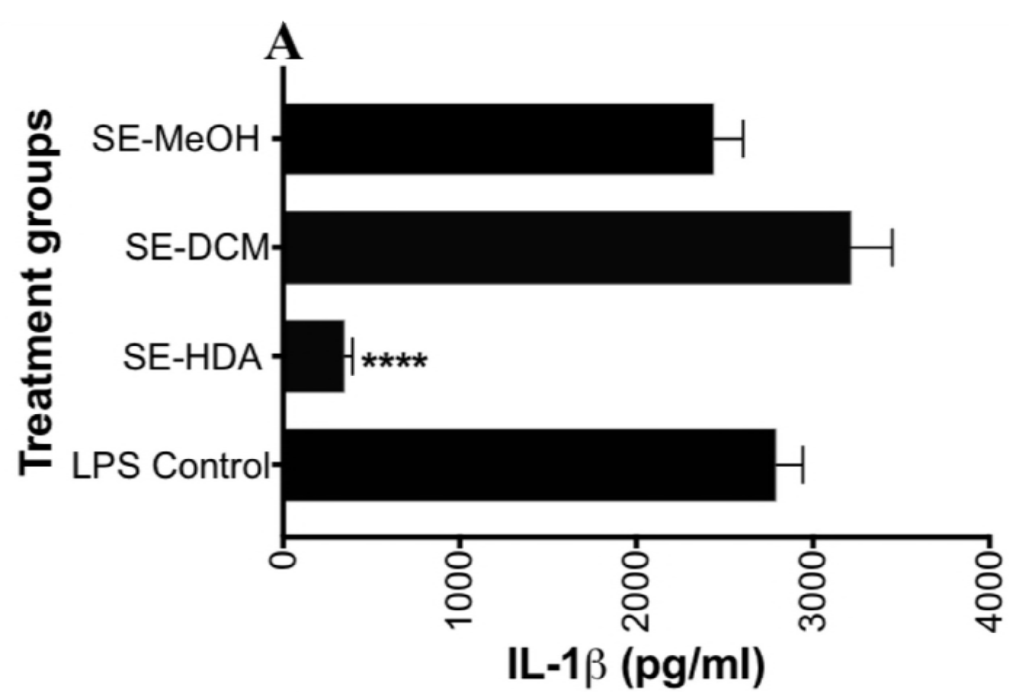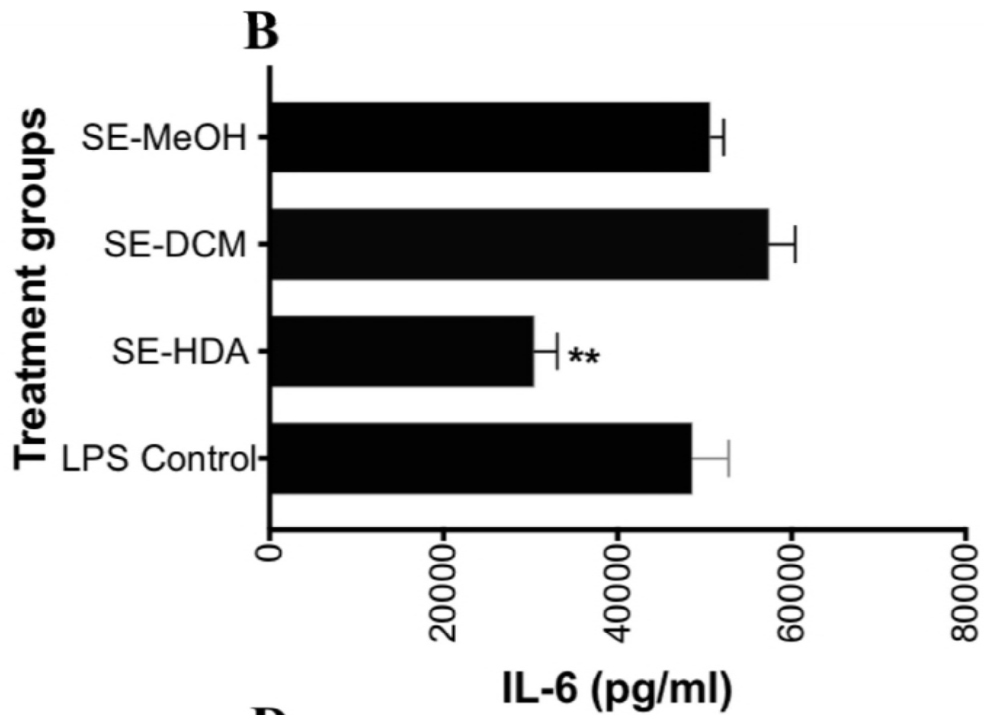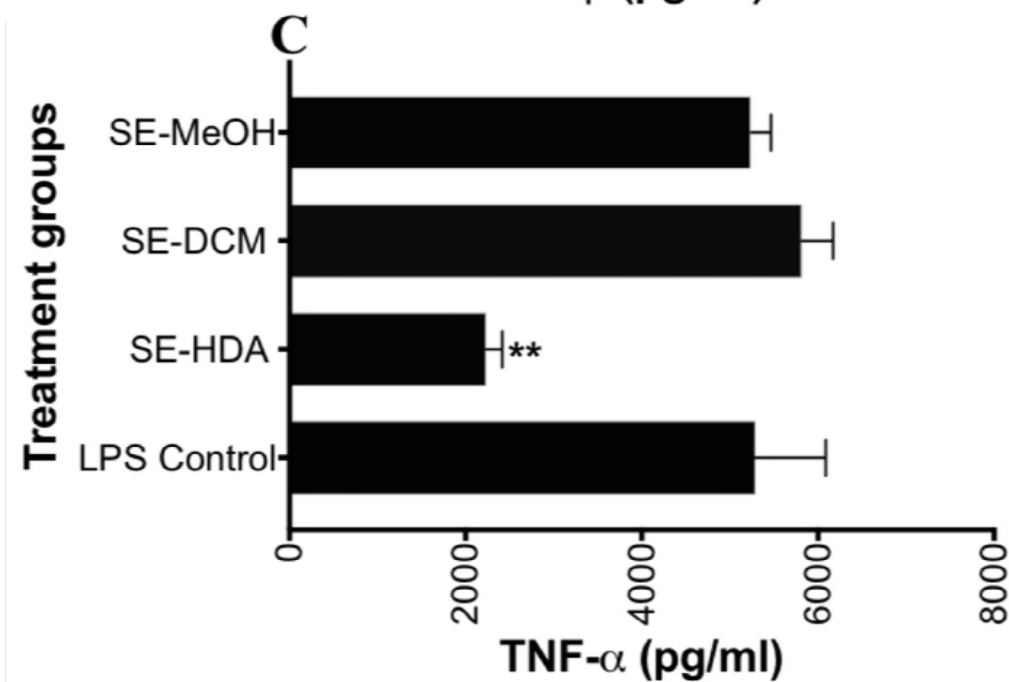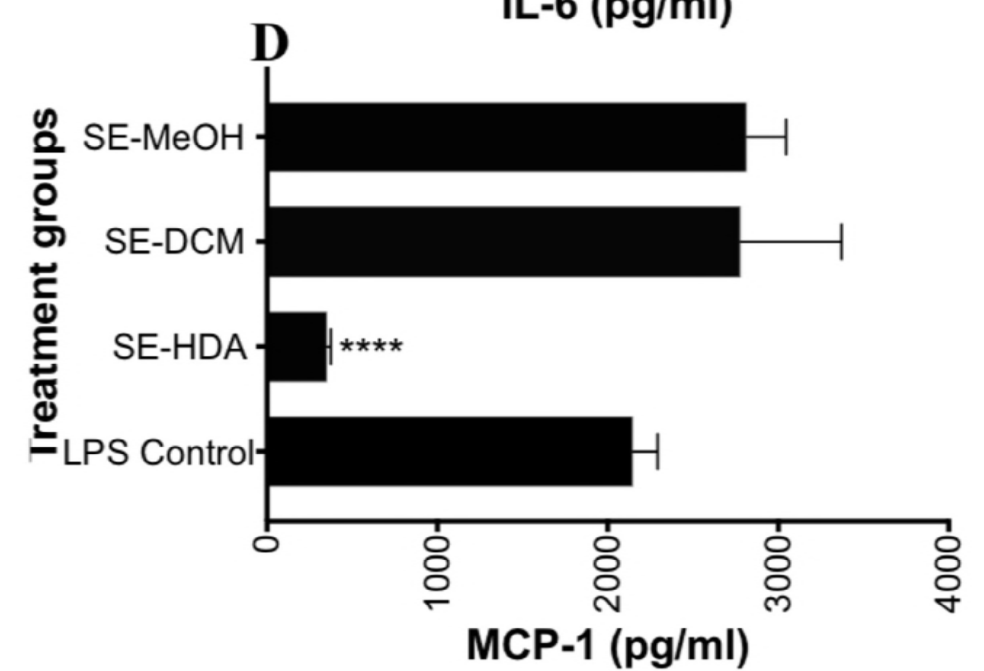



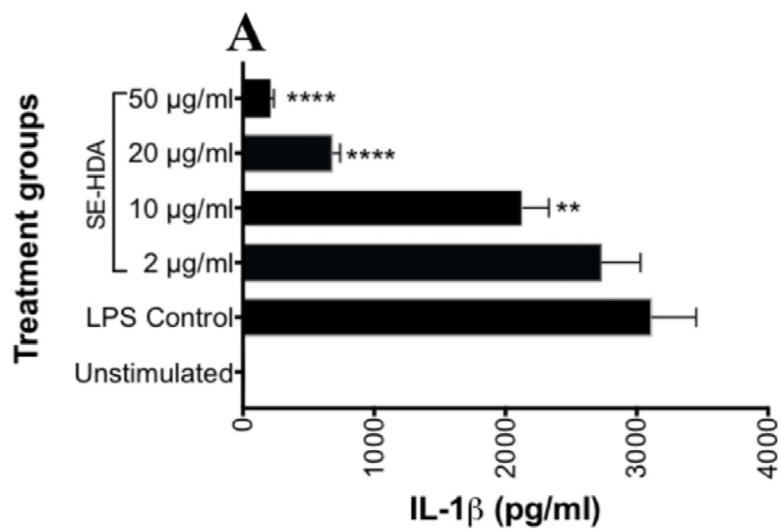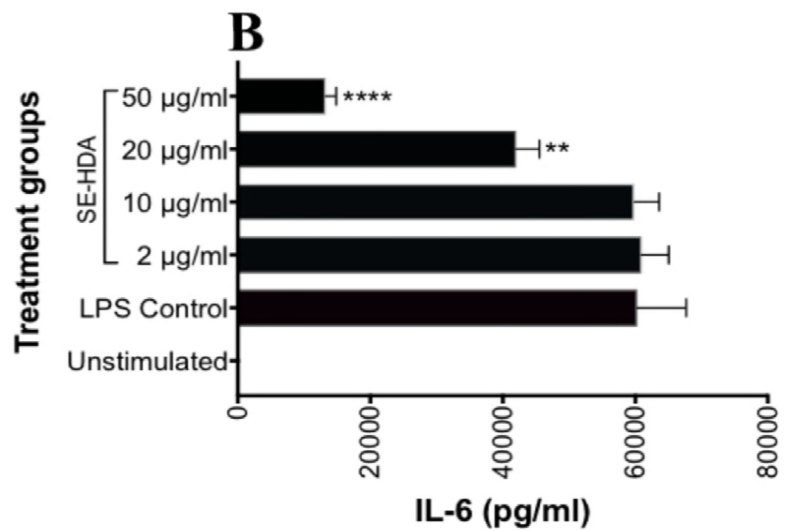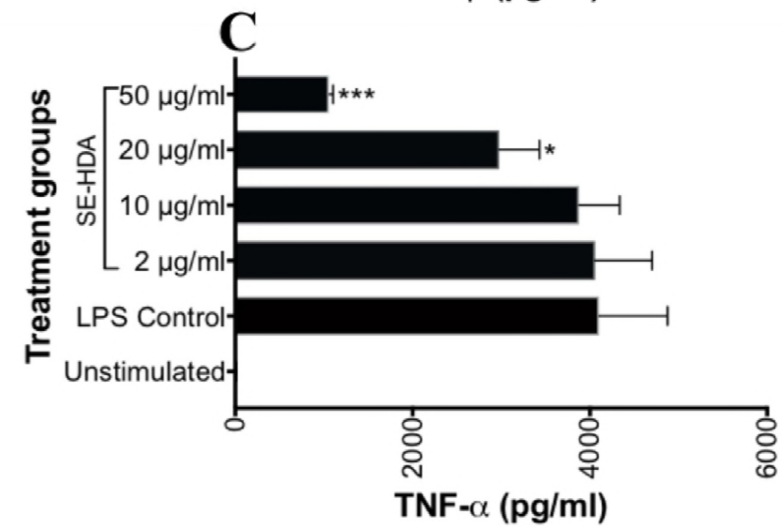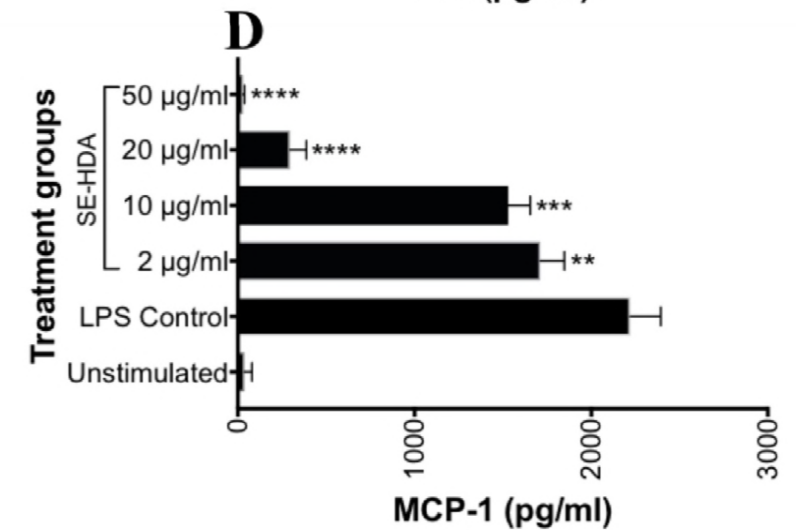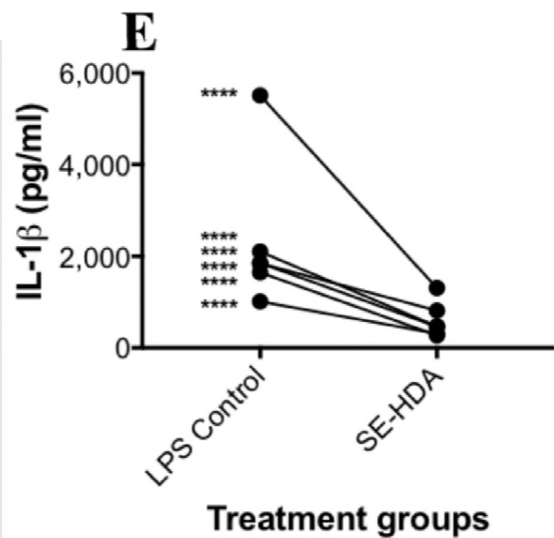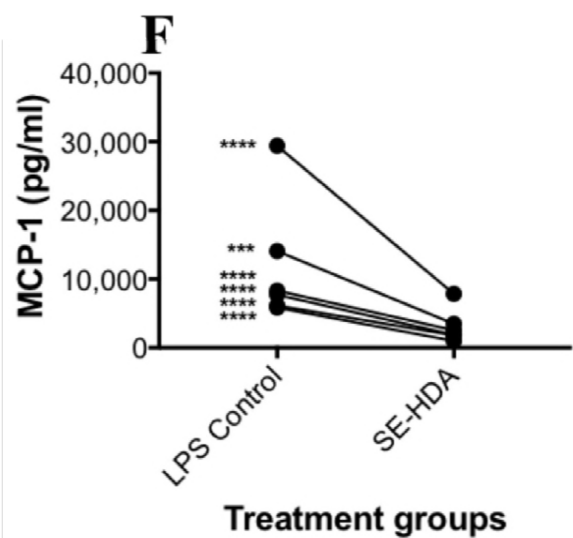

Source: https://www.biorxiv.org/content/10.1101/316885v1.full.pdf
